# Supplementary material for: Biocompatible two-dimensional platelets with tunable sizes from polycarbonate-based block copolymers
Source: Royal Society of Chemistry journal article supplement (doi:10.1039/d5py00078e), 2025-01-01
Supplement: d5py00078e1.pdf [file d5py00078e1.pdf]

## **Biocompatible Two-Dimensional Platelets with Tunable Sizes from Polycarbonate-Based Block Copolymers**

Chuanqi Zhao,<sup>1,#</sup> Hannah Schnicke,<sup>1,#</sup> J. Diego Garcia-Hernandez,<sup>1</sup> Jiandong Cai,<sup>1</sup>

Yifan Zhang,<sup>1,3</sup> Charlotte E. Boott<sup>\*,4</sup>, and Ian Manners<sup>‡1,2</sup>

<sup>1</sup> Department of Chemistry, University of Victoria, Victoria, BC V8W 3V6, Canada

<sup>2</sup> Centre for Advanced Materials and Related Technology (CAMTEC),

University of Victoria, 3800 Finnerty Rd, Victoria, BC, V8P 5C2, Canada

<sup>3</sup>Present address: Key Laboratory of Photochemistry, CAS Research/Education

Center for Excellence in Molecular Sciences, Institute of Chemistry, Chinese

Academy of Sciences, Beijing 100190, China.

<sup>4</sup>Department of Chemistry and Materials Innovation Factory, University of Liverpool,

Liverpool, L7 3NY, UK.

\*To whom correspondence should be addressed: c.boott@liverpool.ac.uk.

#These authors contributed equally

‡Deceased December 3<sup>rd</sup> 2023.

### **Supporting information**

## Table of Contents

|                                                                            |    |
|----------------------------------------------------------------------------|----|
| 1. General Information .....                                               | 3  |
| 1.1 Materials and methods .....                                            | 3  |
| 1.2 Instrumentation .....                                                  | 3  |
| 2. Synthetic Procedures .....                                              | 6  |
| 2.1 Monomer syntheses.....                                                 | 6  |
| 2.2 Synthesis of homopolymers by living ring-opening polymerizations ..... | 12 |
| 2.3 Block copolymer syntheses by living ring-opening polymerizations ..... | 26 |
| 3. Self-Assembly Procedures .....                                          | 44 |
| 4. Aqueous Stability and Biocompatibility Studies .....                    | 53 |
| Culture Protocols.....                                                     | 55 |
| Cell Viability Assays.....                                                 | 55 |
| 5. References .....                                                        | 57 |

## 1. General Information

### 1.1 Materials and methods

THF and methylene chloride (DCM) solvents were dried by a standard “Grubbs” drying system and were stored over 4 Å molecular sieves. Methoxy PEG (5 kDa) was purchased from Polymer Source. All other commercial reagents were purchased from Sigma-Aldrich, Combi-Blocks, and TCI. They were used without further purification unless noted. Trimethylene carbonate was purchased from Combi-Blocks and dried in the oven for 48 h before use in the nitrogen-filled glovebox. 1,8-diazabicyclo[5,4,0]undec-7-ene (DBU) was dried by stirring over CaH<sub>2</sub> and vacuum distillation. N-(3,5-trifluoromethyl)phenyl-N-cyclohexyl- thiourea (TU) was prepared according to reported procedures.<sup>1</sup>

## **1.2 Instrumentation**

### **NMR spectroscopy**

$^1\text{H}$  NMR spectra were recorded on Bruker 500 (500 MHz) or Bruker 300 (300 MHz) at the University of Victoria. The peaks were internally referenced to TMS (0.00 ppm) or residual undeuterated solvent signal. Chemical shifts are quoted in parts per million, while the spectra are referenced to the residual solvent peak. The following abbreviations were used to explain multiplicities: s = singlet, d = doublet, t = triplet, q = quartet, m = multiplet, and br = broad.

### **Ultrasonication**

Micelle sonication was carried out using an ultrasonic processor, UP100H. The instrument was operated at an amplitude of 90% at 0 °C.

### **Gel permeation chromatography (GPC).**

GPC measurements were carried out with the Malvern chromatography system equipped with a refractive index (RI), UV/Vis photodiode detector array, and viscometer.  $\text{Bu}_4\text{NBr}/\text{THF}$  (1 wt %) was used as the eluent (flow rate = 1 mL/min). Results were calibrated against polystyrene standards (Viscotek). Samples were prepared at 1 mg/mL in the eluent.

### **Differential scanning calorimetry (DSC)**

DSC analysis was performed on a TA Instruments Q100 coupled to a RCS90 refrigerated cooling system with scan rates of 10 °C/min. DSC samples of each homopolymer (5-8 mg) were placed in hermetic aluminium pans. The DSC scan was recorded by heating from -60 °C to 180 °C, followed by annealing at 180 °C for 4 min, and subsequently cooling to -60 °C.

### **UV-vis spectroscopy**

UV-vis measurements were performed on an Agilent Cary 60 UV-vis spectrophotometer Xenon flash lamp (80 Hz).

### **Laser scanning confocal microscopy (LSCM).**

Confocal imaging was performed using the ZEISS LSM 880 Axio Observer. Nanoplatelet solutions were aliquoted onto glass coverslips and dried before imaging. Fluorophores were excited using an argon laser operating at 488 nm. Confocal images were obtained using digital detectors with observation windows of 500 – 620 nm. The resulting images were obtained as digital false-color images and then color-coded as green.

### **Atomic force microscopy (AFM)**

AFM analysis was obtained using a 5500 Atomic Force Microscope (Agilent Technologies). The images were recorded in AC mode with a scanning speed of 1.0  $\mu\text{m/s}$  in an area of 4.0  $\mu\text{m}^2$  at 1024 $\times$ 1024 resolution. The samples for AFM were prepared on a silicon wafer by casting a nanoplatelet solution (in  $\sim$  100% MeOH, 10  $\mu\text{L}$ , 0.05 mg/mL) onto the silicon wafer.

### **The X-ray diffraction (XRD)**

XRD data was taken using an EMPYREAN diffractometer system. The instrument uses copper K $\alpha$  radiation (1.5 Å). The measurements were performed on thin films cast from nanoplatelet colloidal dispersions.

### **Transmission electron microscopy (TEM).**

TEM measurements were performed on a JEOL 1011 microscope with a CCD camera, operating at an accelerating voltage of 80 kV. Samples were prepared by drop-casting 9  $\mu\text{L}$  of nanoplatelet solutions onto a carbon-coated copper grid, followed by drop-casting 9  $\mu\text{L}$  of uranyl acetate in MeOH (3 wt %) to negatively stain the samples. The sample concentration for TEM analysis was about 0.5 mg/mL based on nanoplatelet concentration. Copper grids (400 mesh) were purchased from Ted Pella, and carbon films of about 8 nm were prepared on mica by carbon sputtering with a Leica ACE 600 carbon coater. Then, the carbon films were deposited onto the copper grids by floatation on water. Images were analyzed with the software Image J (NIH, USA). For the statistical analyses, more than 100 nanoplatelets in several images were traced by the

software to obtain the area or other information. The number average micelle areas ( $A_n$ ) and weight average micelle areas ( $A_w$ ) were calculated as shown below from measurements of the contour areas ( $A$ ). ( $A$ , area of the object;  $n$ , number).

The distribution of micelle sizes was characterized by  $D_A = A_w/A_n$ .

$$A_n = \frac{\sum_{i=1}^n N_i A_i}{\sum_{i=1}^n A_i}$$

$$A_w = \frac{\sum_{i=1}^n N_i A_i^2}{\sum_{i=1}^n N_i A_i}$$

Values of the standard deviation of the size distribution  $\sigma$  were determined.

$$\sigma = \sqrt{\frac{\sum_{i=1}^n (A_i - A_n)^2}{n}}$$

## 2. Synthetic Procedures

### 2.1 Monomer syntheses

#### Synthesis of 2,2-dimethyltrimethylene carbonate (DTC)

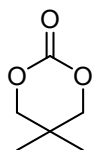

2,2-dimethyl-1,3-propanediol (4.16 g, 1 equiv) was dissolved in 100 mL of THF and cooled to 0 °C. Ethyl chloroformate (10 mL, 10.8 g, 2.5 equiv) was added in one portion, while Et<sub>3</sub>N (13.3 mL, 10.1 g, 2.5 equiv) was added dropwise at 0 °C. After stirring at 0 °C for 1 h, the reaction mixture was warmed up to room temperature and stirred overnight. Ethyl acetate and water were added. The organic layer was separated, dried over MgSO<sub>4</sub> and the solvent was evaporated under reduced pressure. After recrystallization in Et<sub>2</sub>O, DTC was obtained as a white solid (3.9 g, 75%).

**<sup>1</sup>H NMR (500 MHz, CDCl<sub>3</sub>):**  $\delta$  (ppm) = 4.10 (s, 4H, H<sub>a</sub>), 1.15 (s, 6H, H<sub>b</sub>).

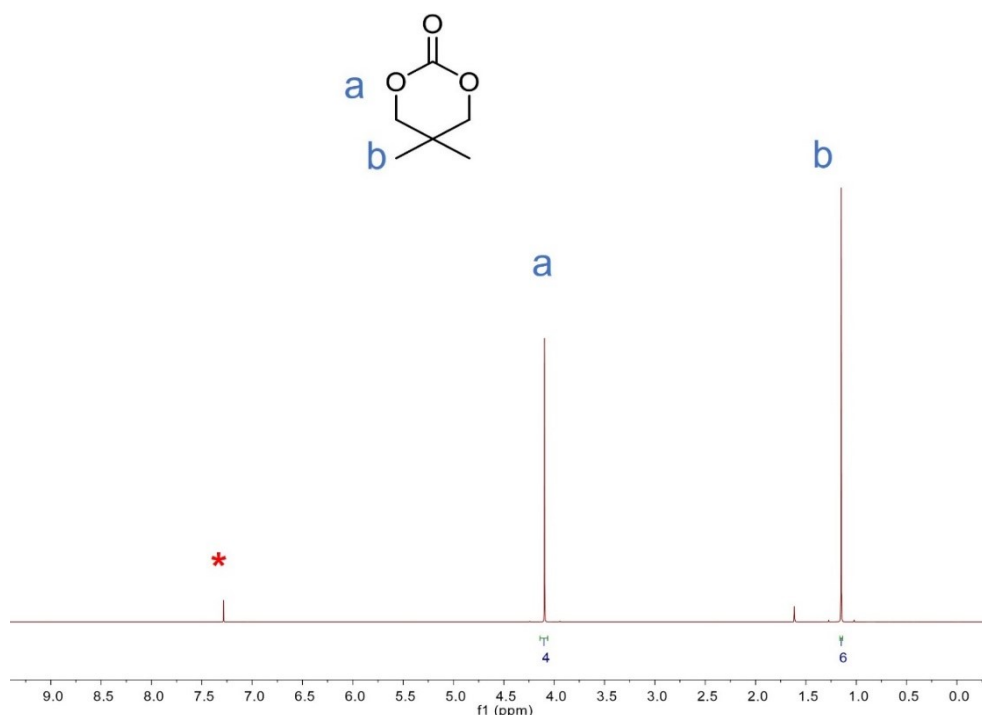

**Figure S1:** <sup>1</sup>H NMR spectra (500 MHz, CDCl<sub>3</sub>) of 2,2-dimethyltrimethylene carbonate (DTC). Deuterated solvent residual signal denoted by \*.

### Synthesis of 2,2-diethyltrimethylene carbonate (DEC)

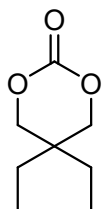

2,2-diethyl-1,3-propanediol (5.28 g, 1 equiv) was dissolved in 100 mL of THF and cooled to 0 °C. Ethyl chloroformate (10 mL, 10.8 g, 2.5 equiv) was added in one portion, while Et<sub>3</sub>N (13.3 mL, 10.1 g, 2.5 equiv) was added dropwise at 0 °C. After stirring at 0 °C for 1 h, the reaction mixture was warmed up to room temperature and stirred overnight. Ethyl acetate and water were added. The organic layer was separated, dried over MgSO<sub>4</sub> and the solvent was evaporated under reduced pressure. After recrystallization in Et<sub>2</sub>O, DEC was obtained as a white solid (4.5 g, 71%).

**<sup>1</sup>H NMR (300 MHz, CDCl<sub>3</sub>):**  $\delta$  (ppm) = 4.13 (s, 4H, H<sub>a</sub>), 1.53 – 1.42 (m, 4H, H<sub>b</sub>), 0.90 (t, 6H, H<sub>c</sub>)

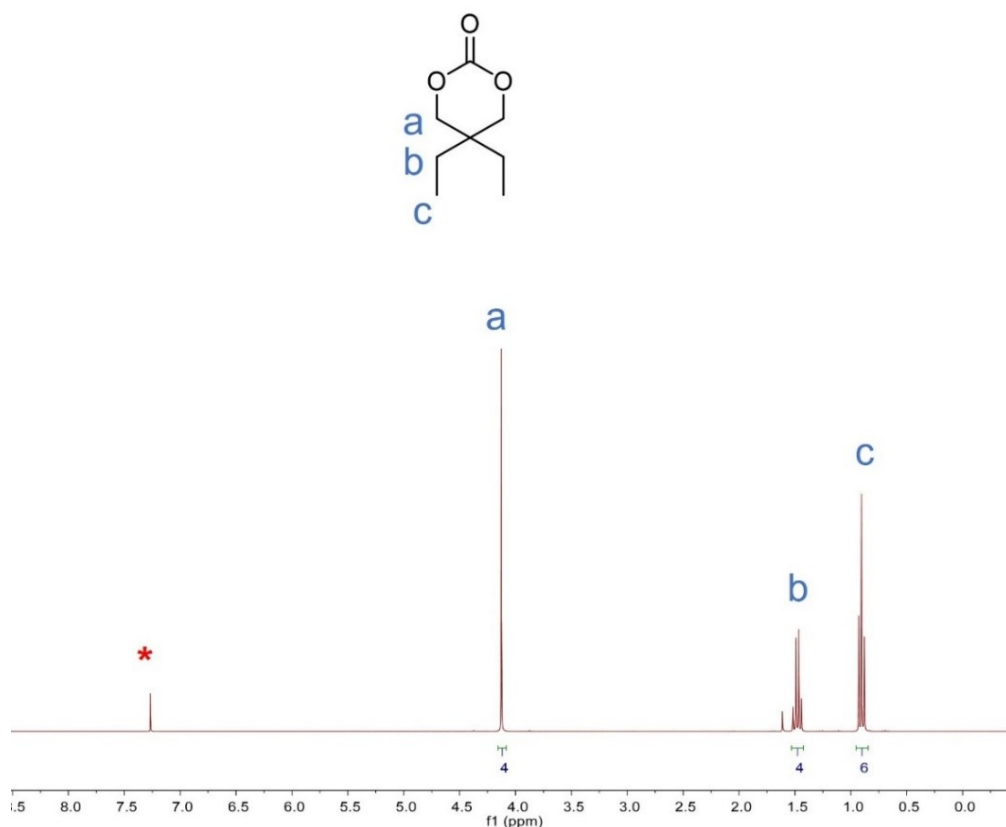

**Figure S2:**  $^1\text{H}$  NMR spectra (300 MHz,  $\text{CDCl}_3$ ) of 2,2-diethyltrimethylene carbonate (DEC).

Deuterated solvent residual signal denoted by \*.

### Synthesis of 2,2-dipropyltrimethylene carbonate (DPC)

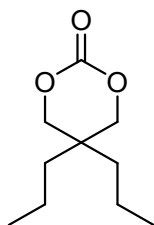

2,2-dipropyl-1,3-propanediol (4.2 g, 1.0 equiv) was dissolved in 100 mL of THF and cooled to 0 °C. Ethyl chloroformate (7.3 mL, 7.9 g, 2.5 equiv) was added in one portion, while  $\text{Et}_3\text{N}$  (9.8 mL, 7.4 g, 2.5 equiv) was added dropwise at 0 °C. After stirring at 0 °C for 1 h, the reaction mixture was warmed up to room temperature and stirred overnight. Ethyl acetate and water were added. The organic layer was separated, dried over  $\text{MgSO}_4$  and the solvent was evaporated under reduced pressure. The product was purified by column chromatography using petroleum and ethyl acetate as the eluent. Compound DPC was obtained as a colorless oil (4.7 g, 96%).

$^1\text{H}$  NMR (300 MHz,  $\text{CDCl}_3$ ):  $\delta$  (ppm) = 4.12 (s, 4H,  $\text{H}_a$ ), 1.40 – 1.20 (m, 8H,  $\text{H}_b$ ), 1.03 – 0.81 (t, 6H,  $\text{H}_c$ ).

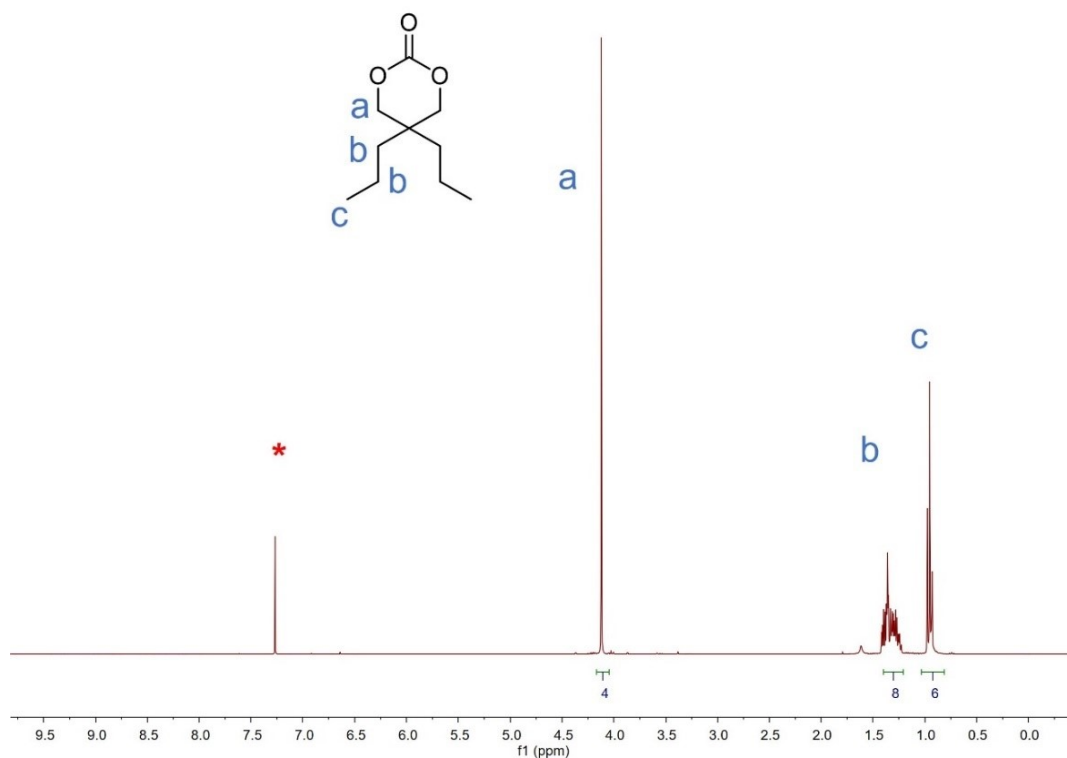

**Figure S3:**  $^1\text{H}$  NMR spectra (300 MHz,  $\text{CDCl}_3$ ) of 2,2-dipropyltrimethylene carbonate (DPC).

Deuterated solvent residual signal denoted by \*.

#### Synthesis of 2,2-dibutyltrimethylene carbonate (DBC)

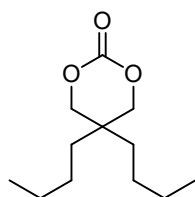

2,2-dibutyl-1,3-propanediol (4.0 g, 1.0 equiv) was dissolved in 100 mL of THF and cooled to 0 °C. Ethyl chloroformate (6.2 mL, 6.9 g, 2.5 equiv) was added in one portion, while  $\text{Et}_3\text{N}$  (8.8 mL, 6.4 g, 2.5 equiv) was added dropwise at 0 °C. After stirring at 0 °C for 1 h, the reaction mixture was warmed up to room temperature and stirred overnight. Ethyl acetate and water was added. The organic layer was separated, dried over  $\text{MgSO}_4$  and the solvent was evaporated under reduced pressure. The product was purified by column chromatography using petroleum and ethyl acetate as the eluent. Compound DBC was obtained as a colorless oil (3.7 g, 81%).

$^1\text{H}$  NMR (300 MHz,  $\text{CDCl}_3$ ):  $\delta$  (ppm) = 4.12 (s, 4H,  $\text{H}_a$ ), 1.45 – 1.15 (m, 12H,  $\text{H}_b$ ), 0.93 (t, 6H,  $\text{H}_c$ ).



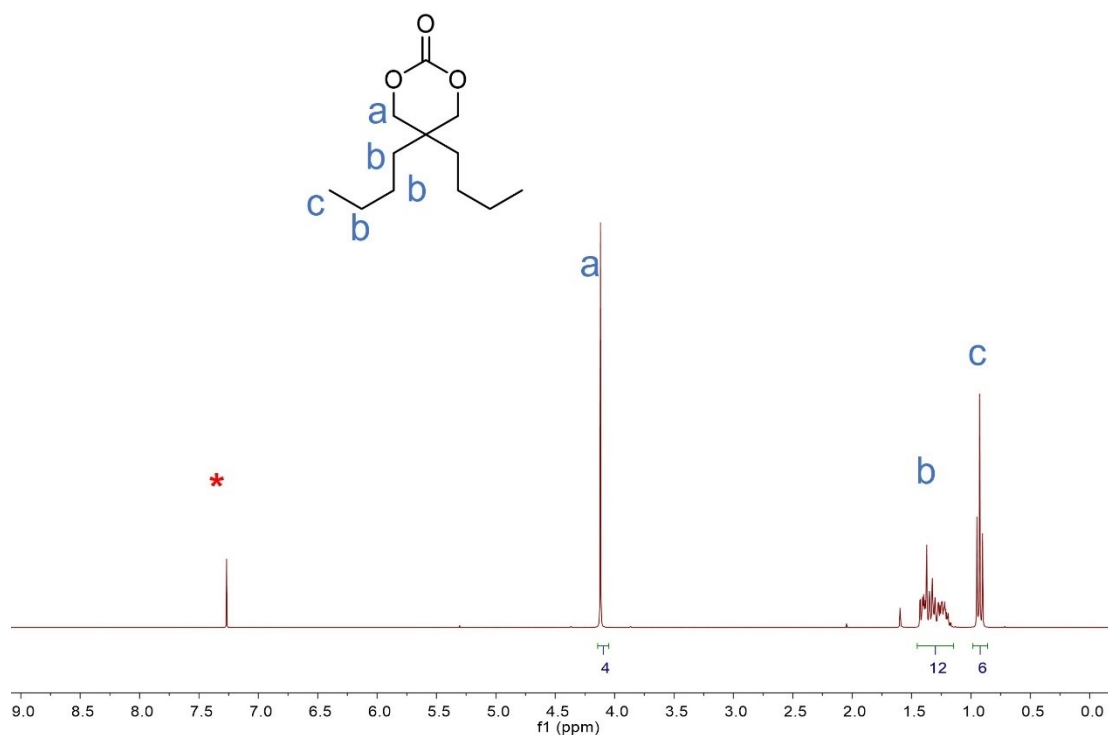

**Figure S4:**  $^1\text{H}$  NMR spectra (300 MHz,  $\text{CDCl}_3$ ) of 2,2-dibutyltrimethylene carbonate (DBC). Deuterated solvent residual signal denoted by \*.

### Synthesis of cyclopropane-trimethylene carbonate (CPC)

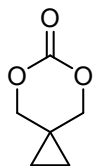

The synthesis of cyclopropane-trimethylene carbonate (CPC) was adapted from the synthesis of DTC.

Cyclopropane-1,3-propanediol (4.0 g, 1 equiv) was dissolved in 100 mL of THF and cooled to 0 °C. Ethyl chloroformate (9.3 mL, 10.6 g, 2.5 equiv) was added in one portion, while  $\text{Et}_3\text{N}$  (13.6 mL, 9.9 g, 2.5 equiv) was added dropwise at 0 °C. After stirring at 0 °C for 1 h, the reaction mixture was warmed up to room temperature and stirred overnight. Ethyl acetate and water were added. The organic layer was separated, dried over  $\text{MgSO}_4$  and the solvent was evaporated under reduced pressure. After recrystallization in  $\text{Et}_2\text{O}$ , CPC was obtained as a white solid (3.8 g, 76%).

$^1\text{H}$  NMR (500 MHz,  $\text{CDCl}_3$ ):  $\delta$  (ppm) = 4.13 (s, 4H,  $\text{H}_a$ ), 0.75 (s, 4H,  $\text{H}_b$ ).

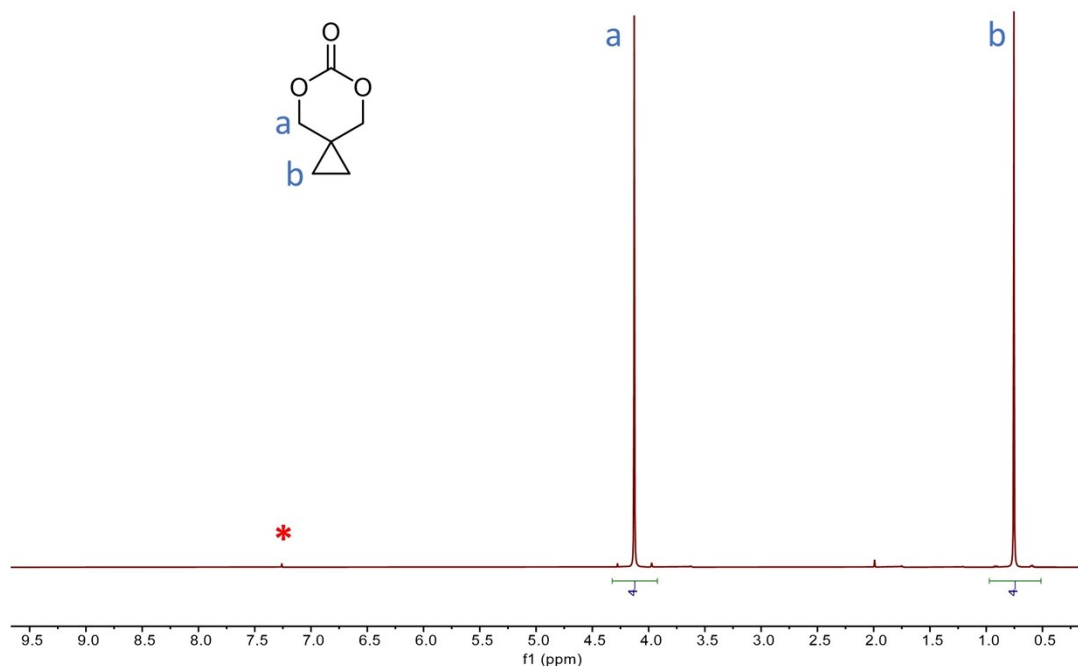

**Figure S5:**  $^1\text{H}$  NMR spectra (500 MHz,  $\text{CDCl}_3$ ) of cyclopentenetrithymethylene carbonate (CPC). Deuterated solvent residual signal denoted by \*.

#### Synthesis of cyclobutane-trimethylene carbonate (CBC)

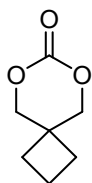

The synthesis of cyclobutene-1,3-diol was adapted from a literature procedure.<sup>2</sup>

The synthesis of cyclobutane-trimethylene carbonate (CBC) was adapted from the synthesis of DTC.

Cyclobutane-1,3-propanediol (4.3 g, 1 equiv) was dissolved in 100 mL of THF and cooled to 0 °C. Ethyl chloroformate (8.7 mL, 10.0 g, 2.5 equiv) was added in one portion, while  $\text{Et}_3\text{N}$  (12.9 mL, 9.4 g, 2.5 equiv) was added dropwise at 0 °C. After stirring at 0 °C for 1 h, the reaction mixture was warmed up to room temperature and stirred overnight. Ethyl acetate and water were added. The organic layer was separated, dried over  $\text{MgSO}_4$  and the solvent was evaporated under reduced pressure. After recrystallization in  $\text{Et}_2\text{O}$ , CBC was obtained as a white solid (3.4 g, 65%).

$^1\text{H}$  NMR (500 MHz,  $\text{CDCl}_3$ ):  $\delta$  (ppm) = 4.28 (s, 4H,  $\text{H}_a$ ), 2.02 (s, 6H,  $\text{H}_b$ ).

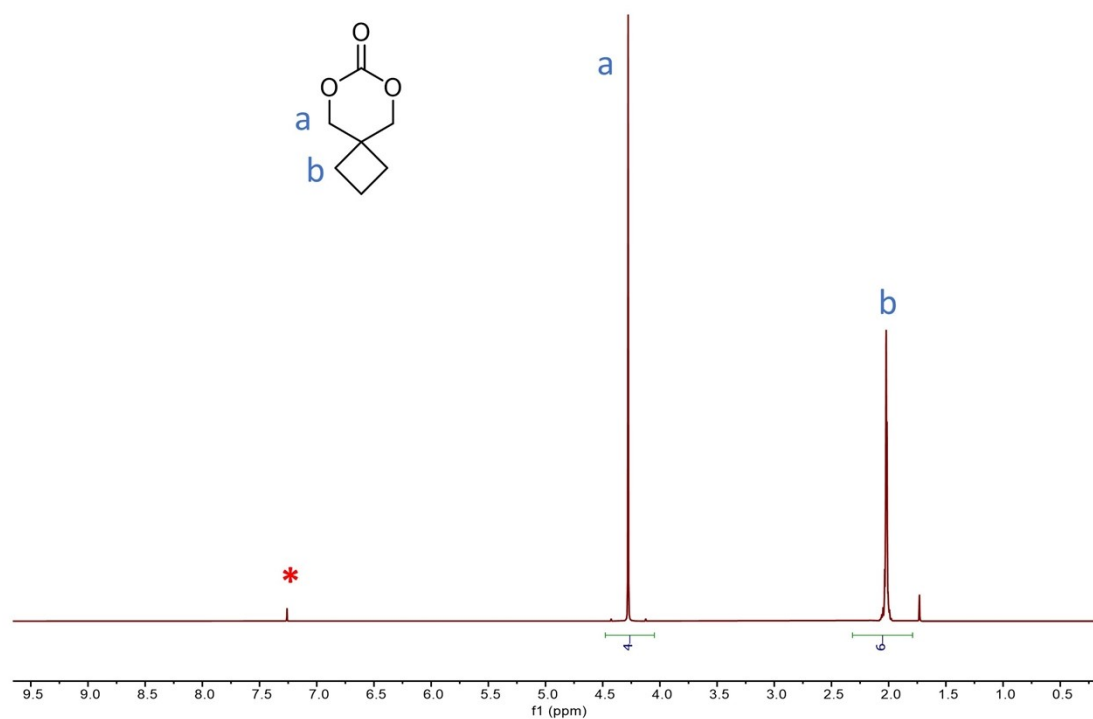

**Figure S6:**  $^1\text{H}$  NMR spectra (500 MHz,  $\text{CDCl}_3$ ) of cyclobutenetrimethylene carbonate (CBC). Deuterated solvent residual signal denoted by \*.

## 2.2 Synthesis of homopolymers by living ring-opening polymerizations

### Synthesis of PTMC<sub>65</sub>

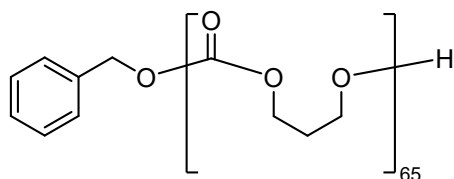

In the nitrogen-filled glovebox, benzyl alcohol (2.2 mg, 1 equiv), TMC (204.0 mg, 100 equiv) and TU (8.9 mg, 1.2 equiv) were added to an oven-dried 2 mL vial equipped with a magnetic bar and dissolved in 150  $\mu$ L of anhydrous DCM. A solution of DBU in DCM (36  $\mu$ L, 100 mg/mL, 1.2 equiv) was added via pipette and the reaction mixture was stirred for 2 h at room temperature. The polymerization was quenched with an excess of benzoic acid (20 mg). The reaction mixture was precipitated three times into 45 mL of ice-cold MeOH and collected by centrifugation. After drying in vacuo overnight, PTMC was obtained as a viscous colorless oil (121 mg, 58%).

**GPC:**  $M_n = 8,630 \text{ g mol}^{-1}$ ,  $D_M = 1.16$ ,  $M_n (^1\text{H NMR}) = 6,740 \text{ g mol}^{-1}$ .

**$^1\text{H NMR}$  (500 MHz,  $\text{CDCl}_3$ ):**  $\delta$  (ppm) = 7.43 – 7.32 (m, 5H,  $\text{H}_d$ ), 5.17 (s, 2H,  $\text{H}_a$ ), 4.26 (t, 260H,  $\text{H}_b$ ), 3.76 (t, 2H,  $\text{H}_c$ ), 2.07 (m, 130H,  $\text{H}_c$ ).

The  $\text{DP}_n$  value of the PTMC block was determined by comparing the relative integration of the methylene moiety of the benzyl end-group (at 5.17 ppm,  $\text{H}_a$ ) with the integration of the methylene protons adjacent to the carbonate carbons ( $\text{H}_b$  and  $\text{H}_c$ ) in the PTMC segment.

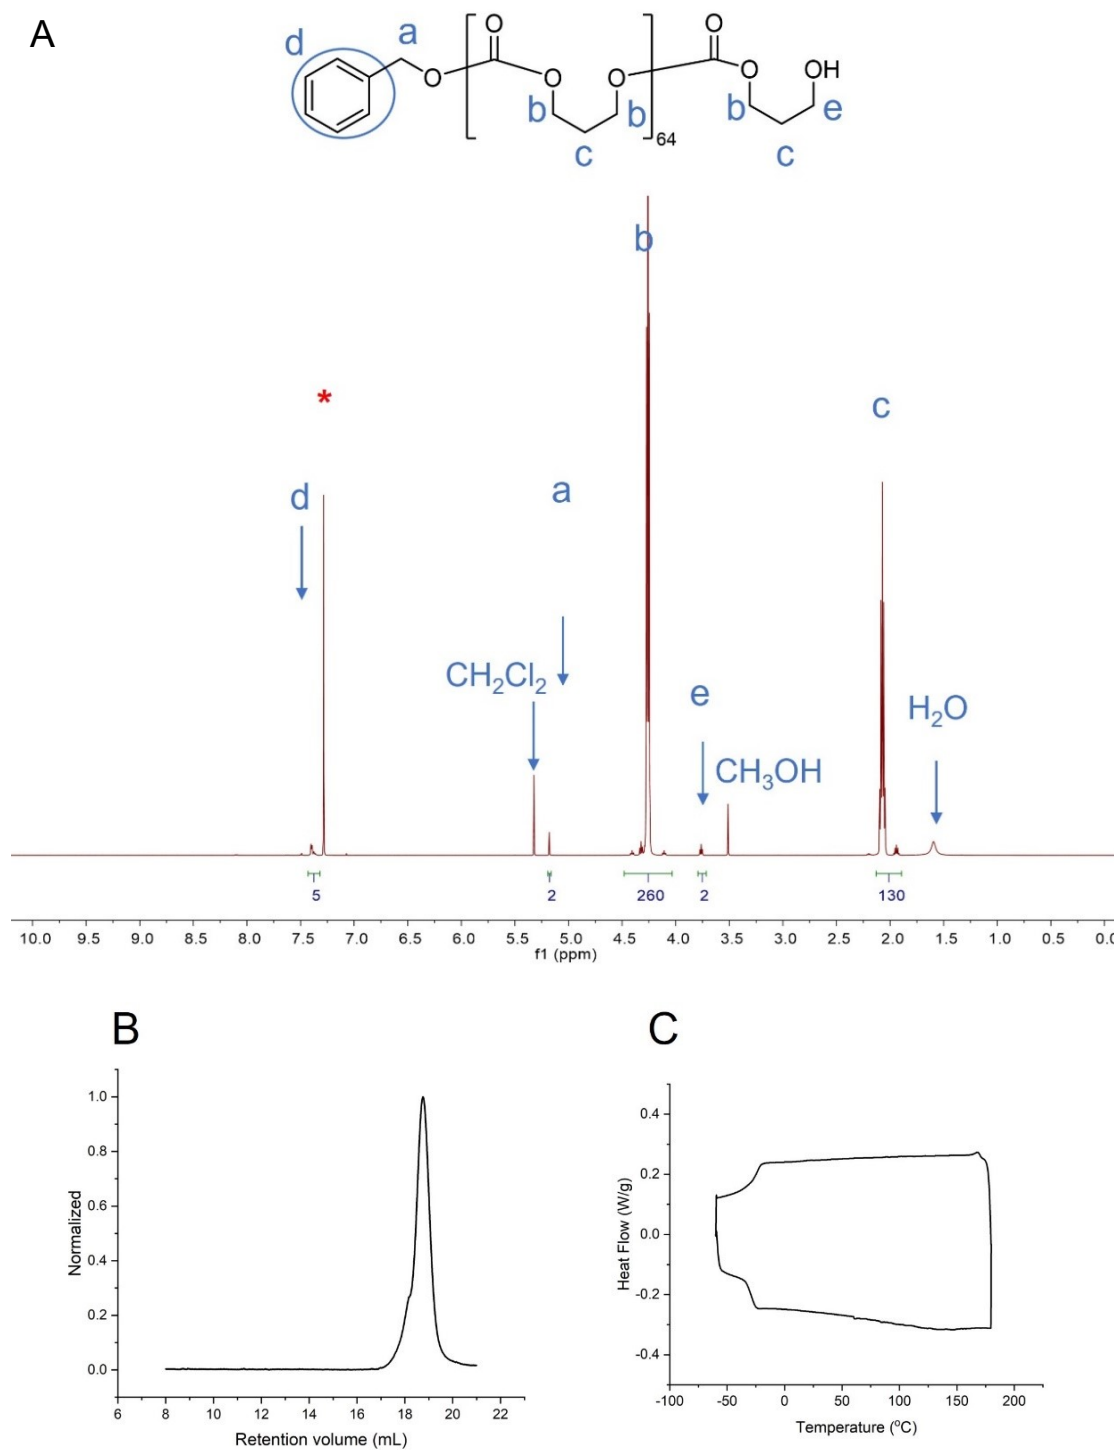

**Figure S7:** (A)  $^1\text{H}$  NMR spectrum (500 MHz,  $\text{CDCl}_3$ ) of  $\text{PTMC}_{65}$ . Deuterated solvent residual signal denoted by \*. (B) GPC chromatogram of  $\text{PTMC}_{65}$  using  $\text{Bu}_4\text{NBr}/\text{THF}$  (1 wt %) as the eluent. (C) DSC thermogram of  $\text{PTMC}_{65}$  homopolymer. The scan was recorded at a heating and cooling rate of  $10\text{ }^\circ\text{C}/\text{min}$ .

### Synthesis of PDTC<sub>88</sub>

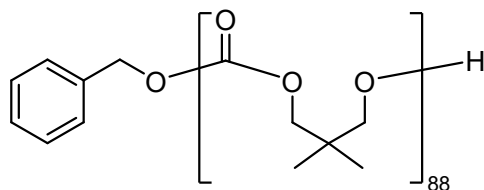

In the nitrogen-filled glovebox, benzyl alcohol (1.1 mg, 1 equiv), DTC (195.0 mg, 150 equiv) and TU (7.4 mg, 2 equiv) were added to an oven-dried 2 mL vial equipped with a magnetic bar and dissolved in 250  $\mu$ L of anhydrous DCM. A solution of DBU in DCM (152  $\mu$ L, 100 mg/mL, 1 equiv) was added via pipette and the reaction mixture was stirred for 24 h at room temperature. The polymerization was quenched with an excess of benzoic acid (20 mg). The reaction mixture was precipitated three times into 45 mL of ice-cold MeOH and collected by centrifugation. After drying in vacuo overnight, PDTC was obtained as a white solid (115.0 mg, 59%).

**GPC:**  $M_n = 14,550 \text{ g mol}^{-1}$ ,  $D_M = 1.30$ ,  $M_n \text{ (NMR)} = 11,560 \text{ g mol}^{-1}$ .

**<sup>1</sup>H NMR (500 MHz, CDCl<sub>3</sub>):**  $\delta$  (ppm) = 7.40 (m, 5H, H<sub>d</sub>), 5.17 (s, 2H, H<sub>a</sub>), 3.99 (s, 352H, H<sub>b</sub>), 3.38 (d, 2H, H<sub>e</sub>), 1.02 (s, 530H, H<sub>c</sub>).

The  $DP_n$  value of the PDTC block was determined by comparing the relative integration of the methylene moiety of the benzyl end-group (at 5.17 ppm, H<sub>a</sub>) with the integration of the methylene protons adjacent to the carbonate carbons (H<sub>b</sub> and H<sub>c</sub>) in the PDTC segment.

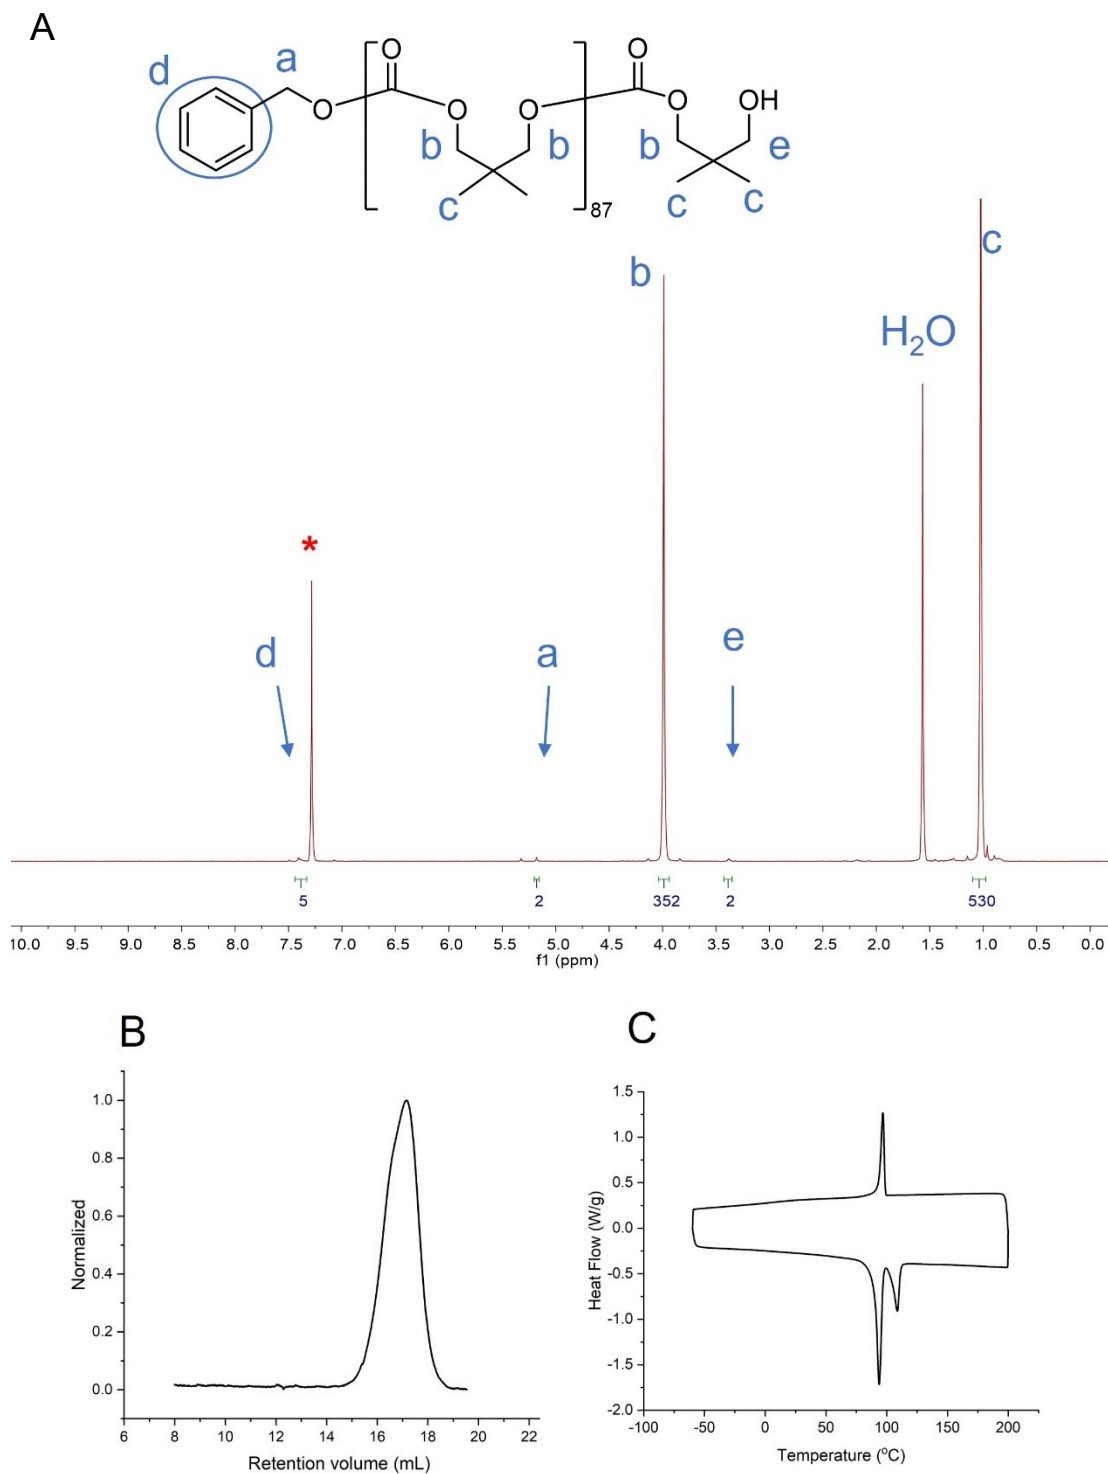

**Figure S8:** (A)  $^1\text{H}$  NMR spectrum (500 MHz,  $\text{CDCl}_3$ ) of  $\text{PDTC}_{88}$ . Deuterated solvent residual signal denoted by \*. (B) GPC chromatogram of  $\text{PDTC}_{88}$  using  $\text{Bu}_4\text{NBr/THF}$  (1 wt %) as the eluent. (C) DSC thermogram of  $\text{PDTC}_{88}$  homopolymer. The scan was recorded at a heating and cooling rate of  $10\text{ }^\circ\text{C/min}$ .

### Synthesis of PDEC<sub>35</sub>

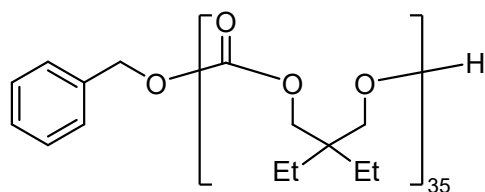

In the nitrogen-filled glovebox, benzyl alcohol (2 mg, 1 equiv), DEC (180 mg, 150 equiv) and TU (4.22 mg, 1.5 equiv) were added to an oven-dried 2 mL vial equipped with a magnetic bar and dissolved in 50  $\mu$ L of anhydrous DCM. A solution of DBU in DCM (173  $\mu$ L, 100 mg/mL, 1.5 equiv) was added via pipette and the reaction mixture was stirred for 24 h at room temperature. The polymerization was quenched with an excess of benzoic acid (20 mg). The reaction mixture was precipitated three times into 45 mL of ice-cold MeOH and collected by centrifugation. After drying in vacuo overnight, the PDEC was obtained as a white solid (42 mg, 23%).

**GPC:**  $M_n = 7,780 \text{ g mol}^{-1}$ ,  $D_M = 1.13$ ,  $M_n \text{ (NMR)} = 5,650 \text{ g mol}^{-1}$ .

**<sup>1</sup>H NMR (500 MHz, CDCl<sub>3</sub>):**  $\delta$  (ppm) = 7.46 – 7.31 (m, 5H, H<sub>d</sub>), 5.17 (s, 2H, H<sub>a</sub>), 4.02 (s, 138H, H<sub>b</sub>), 3.38 (d, 2H, H<sub>e</sub>), 1.38 (m, 140H, H<sub>f</sub>), 0.86 (t, 212H, H<sub>c</sub>).

The DP<sub>n</sub> value of the PDEC block was determined by comparing the relative integration of the methylene moiety of the benzyl end-group (at 5.17 ppm, H<sub>a</sub>) with the integration of the methylene protons adjacent to the carbonate carbons (H<sub>b</sub> and H<sub>e</sub>) in the PDEC segment.



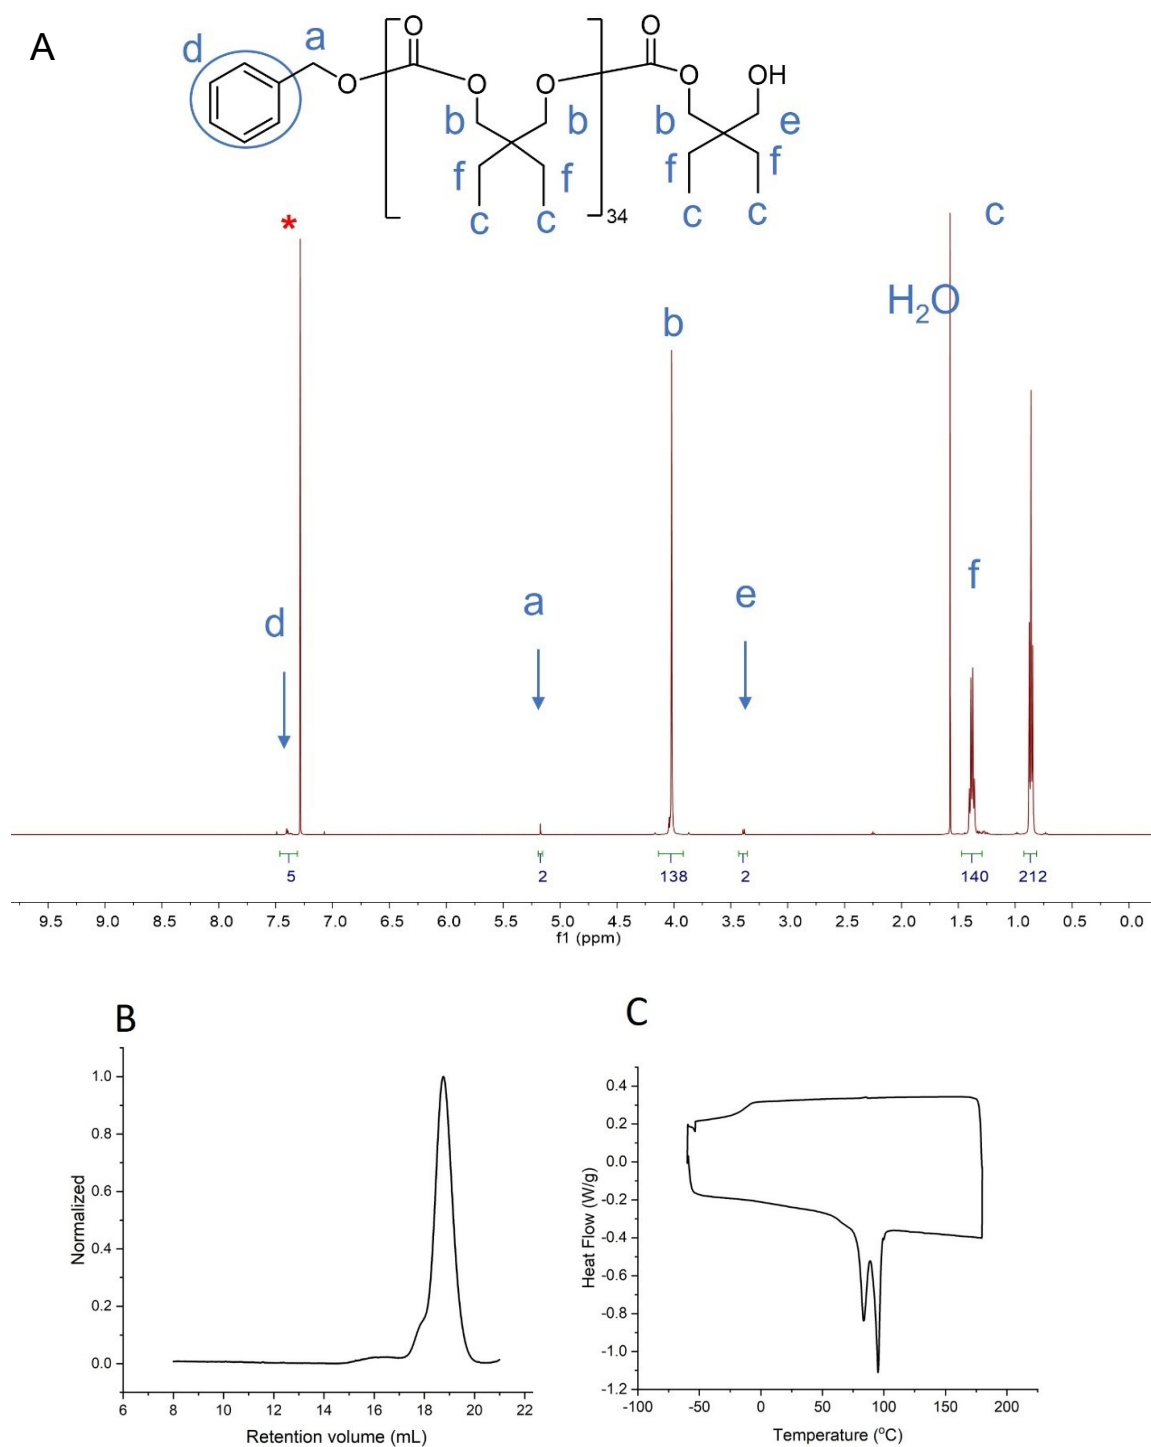

**Figure S9:** (A)  $^1\text{H}$  NMR spectrum (500 MHz,  $\text{CDCl}_3$ ) of  $\text{PDEC}_{35}$ . Deuterated solvent residual signal denoted by \*. (B) GPC chromatogram of  $\text{PDEC}_{35}$  using  $\text{Bu}_4\text{NBr}/\text{THF}$  (1 wt%) as the eluent. (C) DSC thermogram of  $\text{PDEC}_{35}$  homopolymer. The scan was recorded at a heating and cooling rate of  $10\text{ }^\circ\text{C}/\text{min}$ .

### Synthesis of PDPC<sub>58</sub>

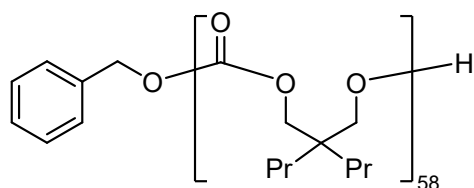

In the nitrogen-filled glovebox, benzyl alcohol (2 mg, 1 equiv) and DPC (344 mg, 100 equiv) were added to an oven-dried 2 mL vial equipped with a magnetic bar and dissolved in 100  $\mu$ L of anhydrous DCM. Diphenyl phosphate (DPP) (23 mg, 5 equiv) was added in one portion and the reaction mixture was stirred for 24 h at 23 °C. The polymerization was quenched with excess benzoic acid (20 mg). The reaction mixture was precipitated three times into 45 mL of ice-cold MeOH and collected by centrifugation. After drying in vacuo overnight, PDPC was obtained as a white solid (175 mg, 51%).

**GPC:**  $M_n = 11,400 \text{ g mol}^{-1}$ ,  $D_M = 1.16$ ,  $M_n \text{ (NMR)} = 10,900 \text{ g mol}^{-1}$ .

**<sup>1</sup>H NMR (500 MHz, CDCl<sub>3</sub>):**  $\delta$  (ppm) = 7.46 – 7.33 (m, 5H, H<sub>d</sub>), 5.17 (s, 2H, H<sub>a</sub>), 4.02 (s, 230H, H<sub>b</sub>), 3.39 (s, 2H, H<sub>e</sub>), 1.29 (d, 466H, H<sub>f</sub>), 0.96 – 0.87 (m, 350H, H<sub>c</sub>).

The  $DP_n$  value of the PDPC block was determined by comparing the relative integration of the methylene moiety of the benzyl end-group (at 5.17 ppm, H<sub>a</sub>) with the integration of the methylene protons adjacent to the carbonate carbons (H<sub>b</sub> and H<sub>e</sub>) in the PDPC segment.

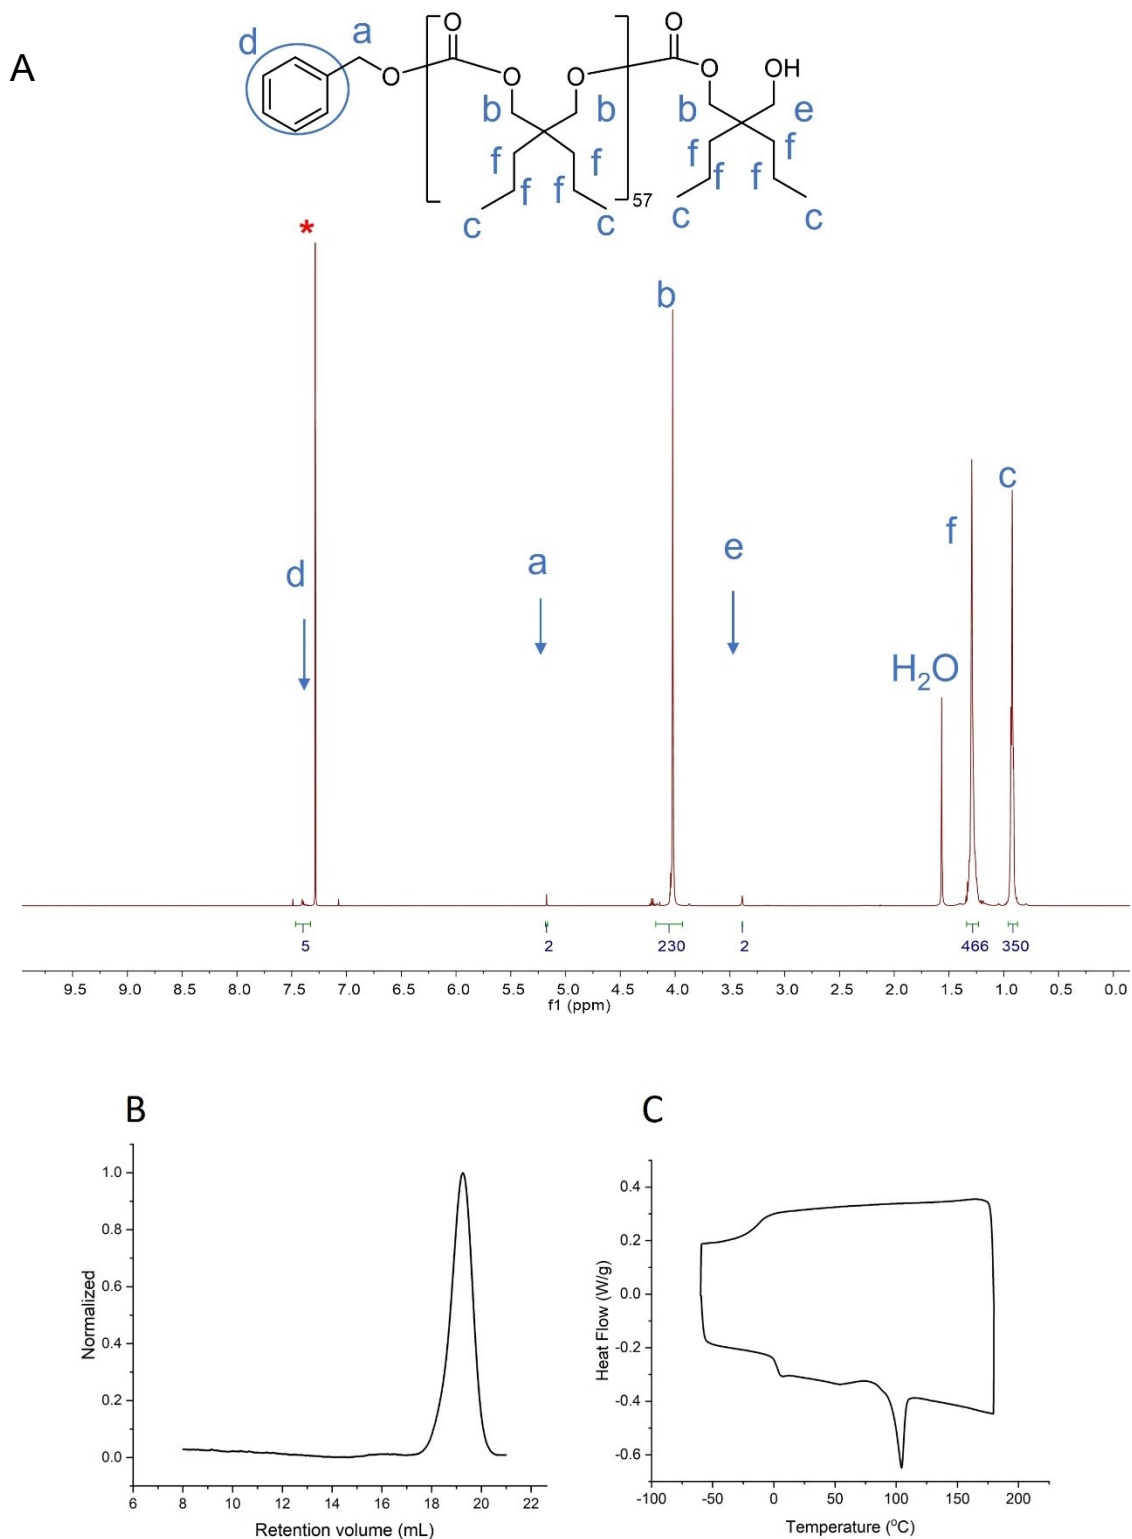

**Figure S10:** (A)  $^1\text{H}$  NMR spectrum (500 MHz,  $\text{CDCl}_3$ ) of  $\text{PDPC}_{58}$ . Deuterated solvent residual signal denoted by \*. (B) GPC chromatogram of  $\text{PDPC}_{58}$  using  $\text{Bu}_4\text{NBr}/\text{THF}$  (1 wt %) as the eluent. (C) DSC thermogram of  $\text{PDPC}_{58}$  homopolymer. The scan was recorded at a heating and cooling rate of  $10\text{ }^\circ\text{C}/\text{min}$ .

### Synthesis of PDBC<sub>26</sub>

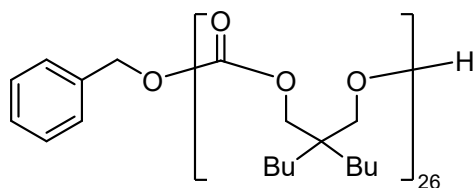

In the nitrogen-filled glovebox, benzyl alcohol (2.7 mg, 1 equiv) and DEC (214 mg, 80 equiv) were added to an oven-dried 2 mL vial equipped with a magnetic bar and dissolved in 200  $\mu$ L of anhydrous DCM. Diphenyl phosphate (DPP) (16.3 mg, 2 equiv) was added in one portion and the reaction mixture was stirred for 24 h at room temperature. The polymerization was quenched with 20  $\mu$ L of Et<sub>3</sub>N. The reaction mixture was precipitated three times into 45 mL of ice-cold MeOH and collected by centrifugation. After drying in vacuo overnight, PDBC was obtained as a colorless oil (65 mg, 30%).

**GPC:**  $M_n = 5,210 \text{ g mol}^{-1}$ ,  $D_M = 1.14$ ,  $M_n \text{ (NMR)} = 5,680 \text{ g mol}^{-1}$ .

**<sup>1</sup>H NMR (500 MHz, CDCl<sub>3</sub>):**  $\delta$  (ppm) = 7.43 – 7.33 (m, 5H, H<sub>d</sub>), 5.17 (s, 2H, H<sub>a</sub>), 4.01 (s, 103H, H<sub>b</sub>), 3.38 (d, 2H, H<sub>e</sub>), 1.34 – 1.19 (m, 317H, H<sub>f</sub>), 0.92 (t, 158H, H<sub>c</sub>).

The DP<sub>n</sub> value of the PDBC block was determined by comparing the relative integration of the methylene moiety of the benzyl end-group (at 5.17 ppm, H<sub>a</sub>) with the integration of the methylene protons adjacent to the carbonate carbons (H<sub>b</sub> and H<sub>e</sub>) in the PDBC segment.

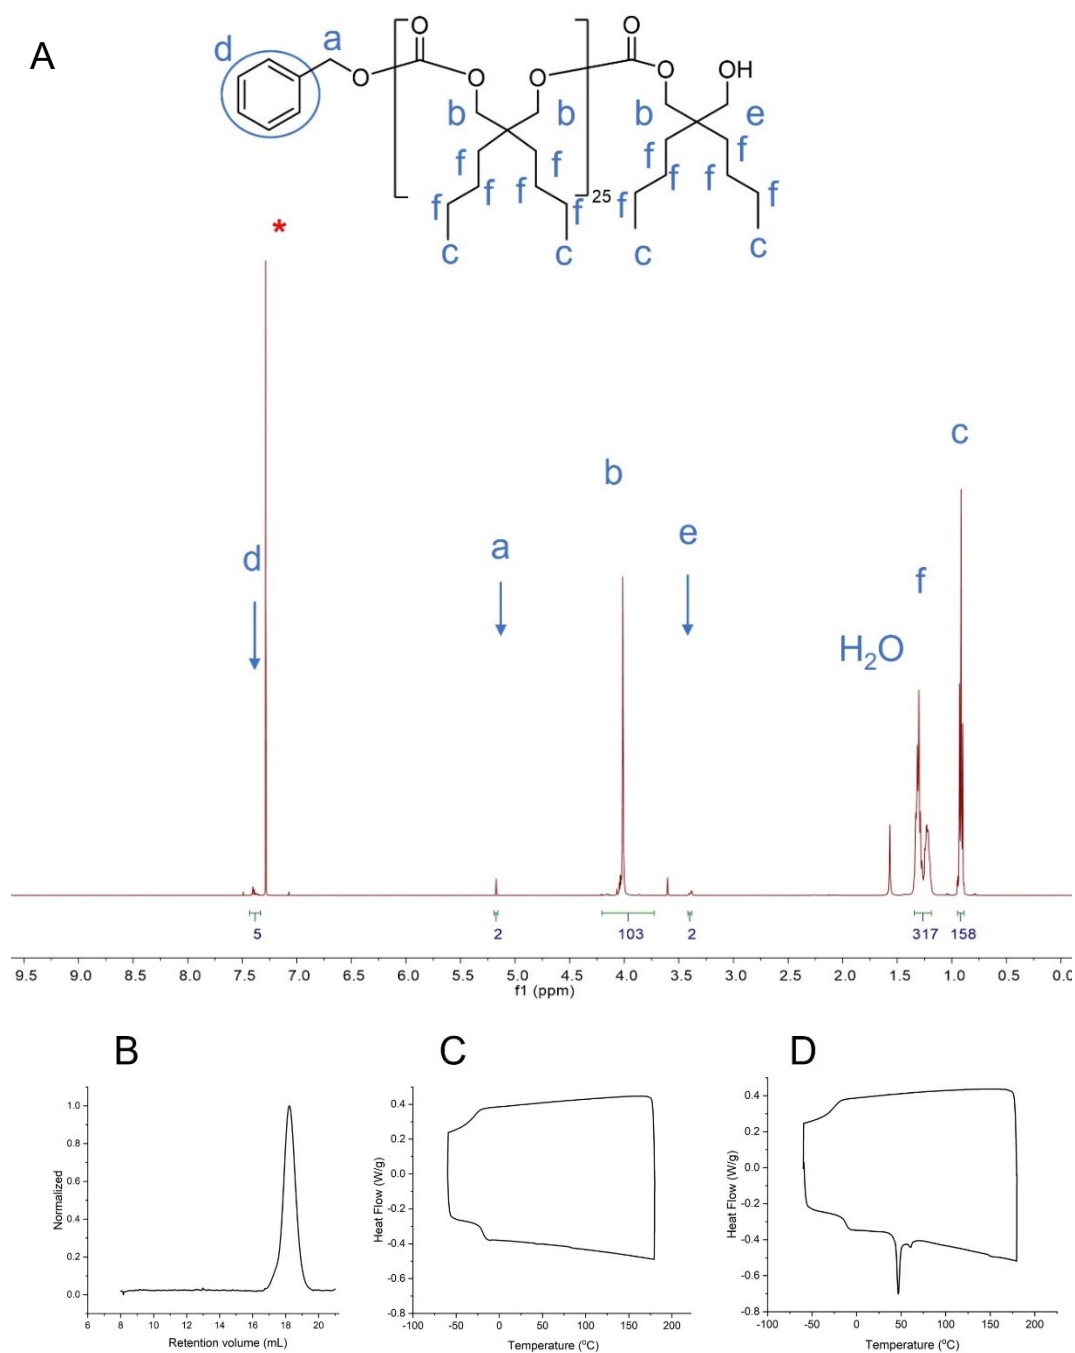

**Figure S11:** (A)  $^1\text{H}$  NMR spectrum (500 MHz,  $\text{CDCl}_3$ ) of  $\text{PDBC}_{26}$ . Deuterated solvent residual signal denoted by \*. (B) GPC chromatogram of  $\text{PDBC}_{26}$  using  $\text{Bu}_4\text{NBr}/\text{THF}$  (1 wt %) as the eluent. (C) DSC thermogram of  $\text{PDBC}_{26}$  freshly prepared homopolymer. (D) DSC thermogram of  $\text{PDBC}_{26}$  homopolymer was conducted after storing at room temperature for 3 months. The scan was recorded at a heating and cooling rate of  $10\text{ }^\circ\text{C}/\text{min}$ .

### Synthesis of PCPC<sub>31</sub>

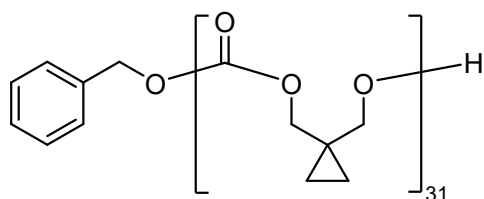

In the nitrogen-filled glovebox, benzyl alcohol (2.7 mg, 1 equiv), CPC (128 mg, 40 equiv) and TU (18.5 mg, 0.05 equiv) were added to an oven-dried 2 mL vial equipped with a magnetic bar and dissolved in 300  $\mu$ L of anhydrous DCM. A solution of DBU in DCM (38  $\mu$ L, 100 mg/mL, 0.025 equiv) was added via pipette and the reaction mixture was stirred for 24 h at room temperature. The polymerization was quenched with an excess of benzoic acid (15 mg). The reaction mixture was precipitated three times into 45 mL of ice-cold MeOH and collected by centrifugation. After drying in vacuo overnight, the PCPC was obtained as a white solid (105 mg, 81%).

**GPC:**  $M_n = 2,600 \text{ g mol}^{-1}$ ,  $D_M = 1.10$ ,  $M_n \text{ (NMR)} = 4,100 \text{ g mol}^{-1}$ .

**<sup>1</sup>H NMR (500 MHz, CDCl<sub>3</sub>):**  $\delta$  (ppm) = 7.37 (m, 5H, H<sub>d</sub>), 5.16 (s, 2H, H<sub>a</sub>), 4.08 (s, 122H, H<sub>b</sub>), 3.50 (d, 2H, H<sub>e</sub>), 0.70 (m, 124H, H<sub>c</sub>).

The DP<sub>n</sub> value of the PCPC block was determined by comparing the relative integration of the methylene moiety of the benzyl end-group (at 5.16 ppm, H<sub>a</sub>) with the integration of the methylene protons adjacent to the carbonate carbons (H<sub>b</sub> and H<sub>c</sub>) in the PCPC segment.

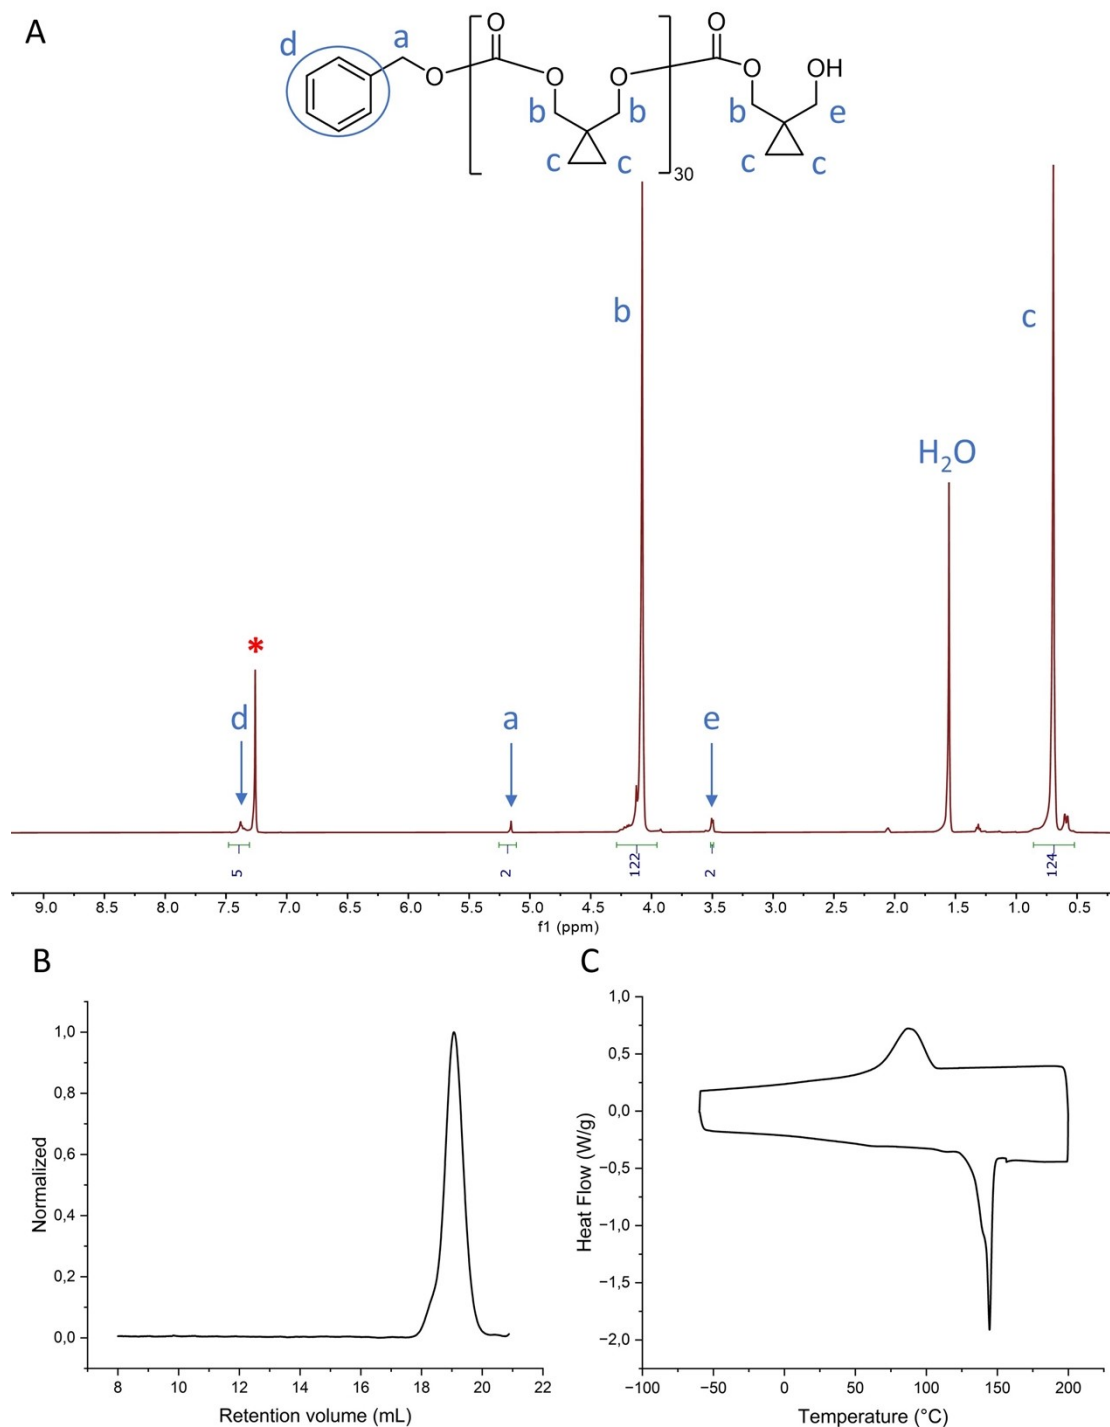

**Figure S12:** (A)  $^1\text{H}$  NMR spectrum (500 MHz,  $\text{CDCl}_3$ ) of  $\text{PCPC}_{31}$ . Deuterated solvent residual signal denoted by \*. (B) GPC chromatogram of  $\text{PCPC}_{31}$  using  $\text{Bu}_4\text{NBr}/\text{THF}$  (1 wt %) as the eluent. (C) DSC thermogram of  $\text{PCPC}_{31}$  freshly prepared homopolymer. (D) DSC thermogram of  $\text{PDBC}_{31}$  homopolymer. The scan was recorded at a heating and cooling rate of  $10\text{ }^\circ\text{C}/\text{min}$ .

### Synthesis of PCBC<sub>n</sub>

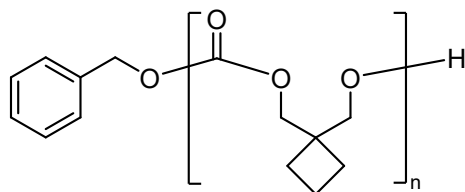

In the nitrogen-filled glovebox, benzyl alcohol (2.7 mg, 1 equiv), CBC (142 mg, 40 equiv) and TU (18.5 mg, 0.05 equiv) were added to an oven-dried 2 mL vial equipped with a magnetic bar and dissolved in 300  $\mu$ L of anhydrous DCM. A solution of DBU in DCM (38  $\mu$ L, 100 mg/mL, 0.025 equiv) was added via pipette and the reaction mixture was stirred for 24 h at room temperature. The polymerization was quenched with an excess of benzoic acid (15 mg). The reaction mixture was precipitated three times into 45 mL of ice-cold MeOH and collected by centrifugation. After drying in vacuo overnight, the PCBC was obtained as a white solid (90 mg, 62%).

No <sup>1</sup>H-NMR and GPC characterization of PCPC<sub>n</sub> could be performed as the homopolymer is insoluble.

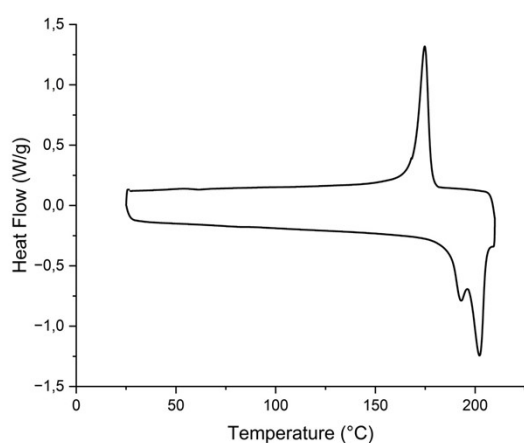

**Figure S13:** DSC thermogram of PDBC<sub>31</sub> homopolymer. The scan was recorded at a heating and cooling rate of 10 °C/min.



**Table S1:** Synthesis of polycarbonate homopolymers with cyclic side groups via ROP.

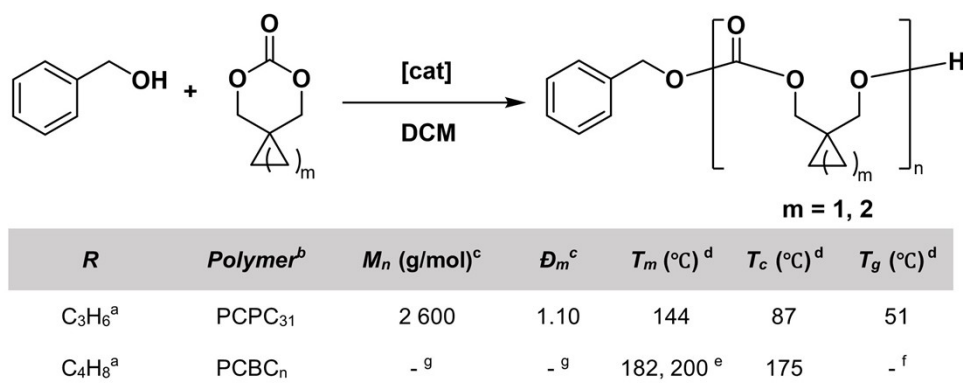

<sup>a</sup>TU (N-(3,5-trifluoromethyl)phenyl-N-cyclohexyl- thiourea) was used as the catalyst, DBU (1,8-Diazabicyclo[5.4.0]undec-7-ene) was used as base for the polymerization. <sup>b</sup>Determined by <sup>1</sup>H NMR spectroscopy. <sup>c</sup>Determined by GPC versus polystyrene standards. <sup>d</sup>Determined from the DSC thermogram. <sup>e</sup>Two temperatures indicate two distinct peaks in the DSC data, suggesting coexistence of two crystal forms. <sup>f</sup>The absence of the *T<sub>g</sub>* value is due to annealing of the polymer. <sup>g</sup> No <sup>1</sup>H-NMR spectroscopy and GPC characterization due to insolubility of the homopolymer.

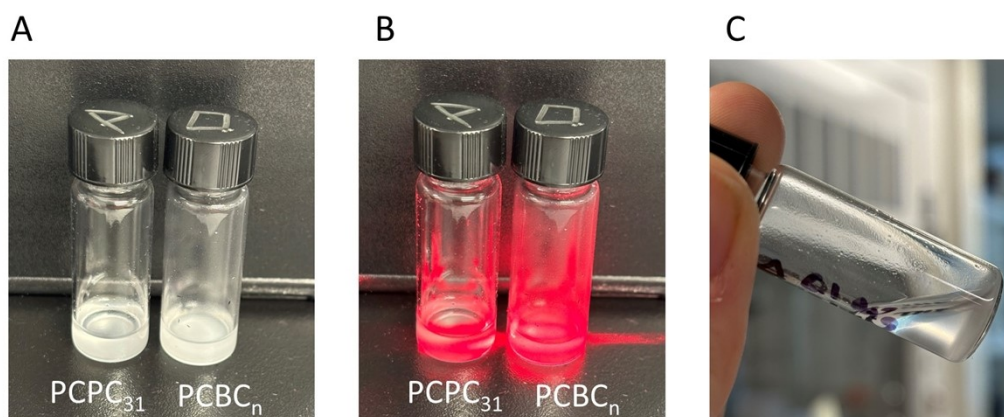

**Figure S14:** (A) Photo of attempt to solubilize PCPC<sub>31</sub> and PCBC<sub>n</sub> in THF (10 mg/mL). (B) Photo of the tyndall effect of PCPC<sub>31</sub> and PCBC<sub>n</sub> in THF (10 mg/mL) showing poor solubility of the homopolymers. A red laser pointer as used as a light source. (C) Close up of PCPC<sub>31</sub> in THF (10 mg/mL) after heating to 70 °C, showing that the homopolymer is insoluble.

## 2.3 Block copolymer syntheses by living ring-opening polymerizations

### Synthesis of PDTC<sub>10</sub>-*b*-PEG<sub>124</sub>

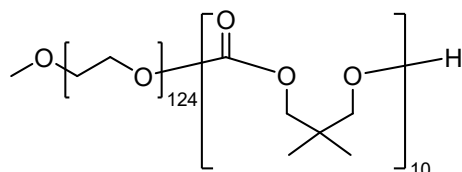

In the nitrogen-filled glovebox, PEG<sub>135</sub> (50 mg, 1 equiv) and DTC (26 mg, 20 equiv) were added to an oven-dried 2 mL vial equipped with a magnetic bar and dissolved in 300  $\mu$ L of anhydrous DCM. A solution of DBU in DCM (15  $\mu$ L, 100 mg/mL, 1 equiv) was added via pipette and the vial was capped. The reaction mixture was stirred for 24 h at room temperature and quenched with an excess of benzoic acid (15 mg). The reaction mixture was precipitated three times into 45 mL of ice-cold MeOH and collected by centrifugation. After drying in vacuo overnight, the block polymer was obtained as a white solid (67 mg, 83%).

**GPC:**  $M_n = 7,770 \text{ g mol}^{-1}$ ,  $D_M = 1.05$ ,  $M_n \text{ (NMR)} = 6,800 \text{ g mol}^{-1}$ .

**<sup>1</sup>H NMR (500 MHz, CDCl<sub>3</sub>):**  $\delta$  (ppm) = 4.00 (d, 40H, H<sub>c</sub>), 3.67 (s, 497H, H<sub>b</sub>), 3.40 (m, 5H, H<sub>a</sub> and H<sub>e</sub>), 1.02 (m, 60H, H<sub>d</sub>).

The  $DP_n$  value of the PDTC block was determined by comparing the relative integration of the methoxy end-group of PEG (at 3.40 ppm, H<sub>a</sub>) with the integration of the methylene protons adjacent to the carbonate carbons (at 3.99 ppm) in the PDTC segment.

**A**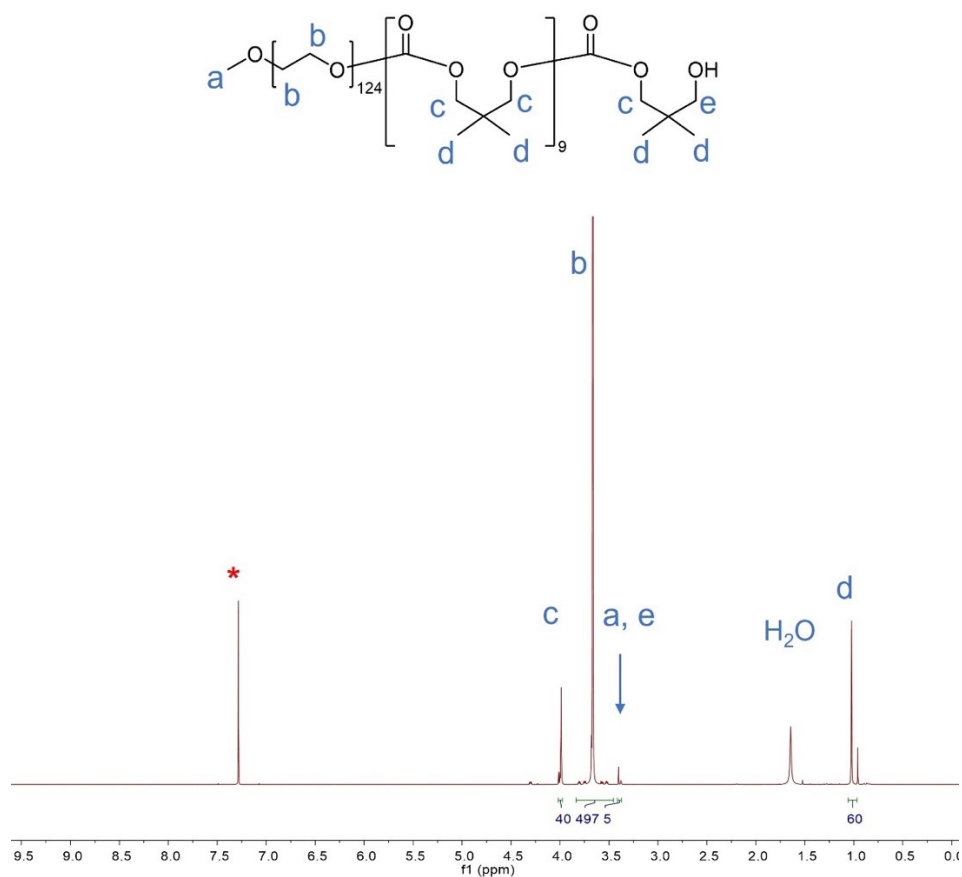**B**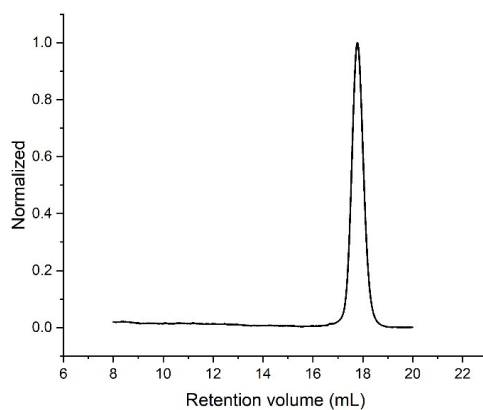

**Figure S15:** (A) <sup>1</sup>H NMR spectrum (500 MHz, CDCl<sub>3</sub>) of PDTC<sub>10</sub>-b-PEG<sub>124</sub>. Deuterated solvent residual signal denoted by \*. (B) GPC chromatogram of PDTC<sub>10</sub>-b-PEG<sub>124</sub> using Bu<sub>4</sub>NBr/THF (1% v/v) as the eluent.

### Synthesis of PDTC<sub>16</sub>-*b*-PEG<sub>129</sub>

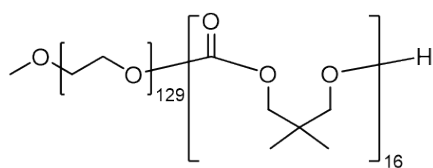

In the nitrogen-filled glovebox, PEG<sub>135</sub> (50 mg, 1 equiv) and DTC (39 mg, 30 equiv), were added to an oven-dried 2 mL vial equipped with a magnetic bar and dissolved in 300  $\mu$ L of anhydrous DCM. A solution of DBU in DCM (15  $\mu$ L, 100 mg/mL, 1 equiv) was added via pipette and the vial was capped. After stirring the reaction mixture for 24 h at room temperature the polymerization was quenched with an excess of benzoic acid (15 mg). The reaction mixture was precipitated three times into 45 mL of ice-cold MeOH and collected by centrifugation. After drying in vacuo overnight, the block polymer was obtained as a white solid (76 mg, 80%).

**GPC:**  $M_n = 9,600 \text{ g mol}^{-1}$ ,  $D_M = 1.07$ ,  $M_n \text{ (NMR)} = 7,780 \text{ g mol}^{-1}$ .

**<sup>1</sup>H NMR (500 MHz, CDCl<sub>3</sub>):**  $\delta$  (ppm) = 3.99 (s, 64H, H<sub>c</sub>), 3.67 (s, 516H, H<sub>b</sub>), 3.40 (m, 5H, H<sub>a</sub> and H<sub>e</sub>), 1.02 (s, 96H, H<sub>d</sub>).

The  $DP_n$  value of the PDTC block was determined by comparing the relative integration of the methoxy end-group of PEG (at 3.40 ppm, H<sub>a</sub>) with the integration of the methylene protons adjacent to the carbonate carbons (at 3.99 ppm) in the PDTC segment.

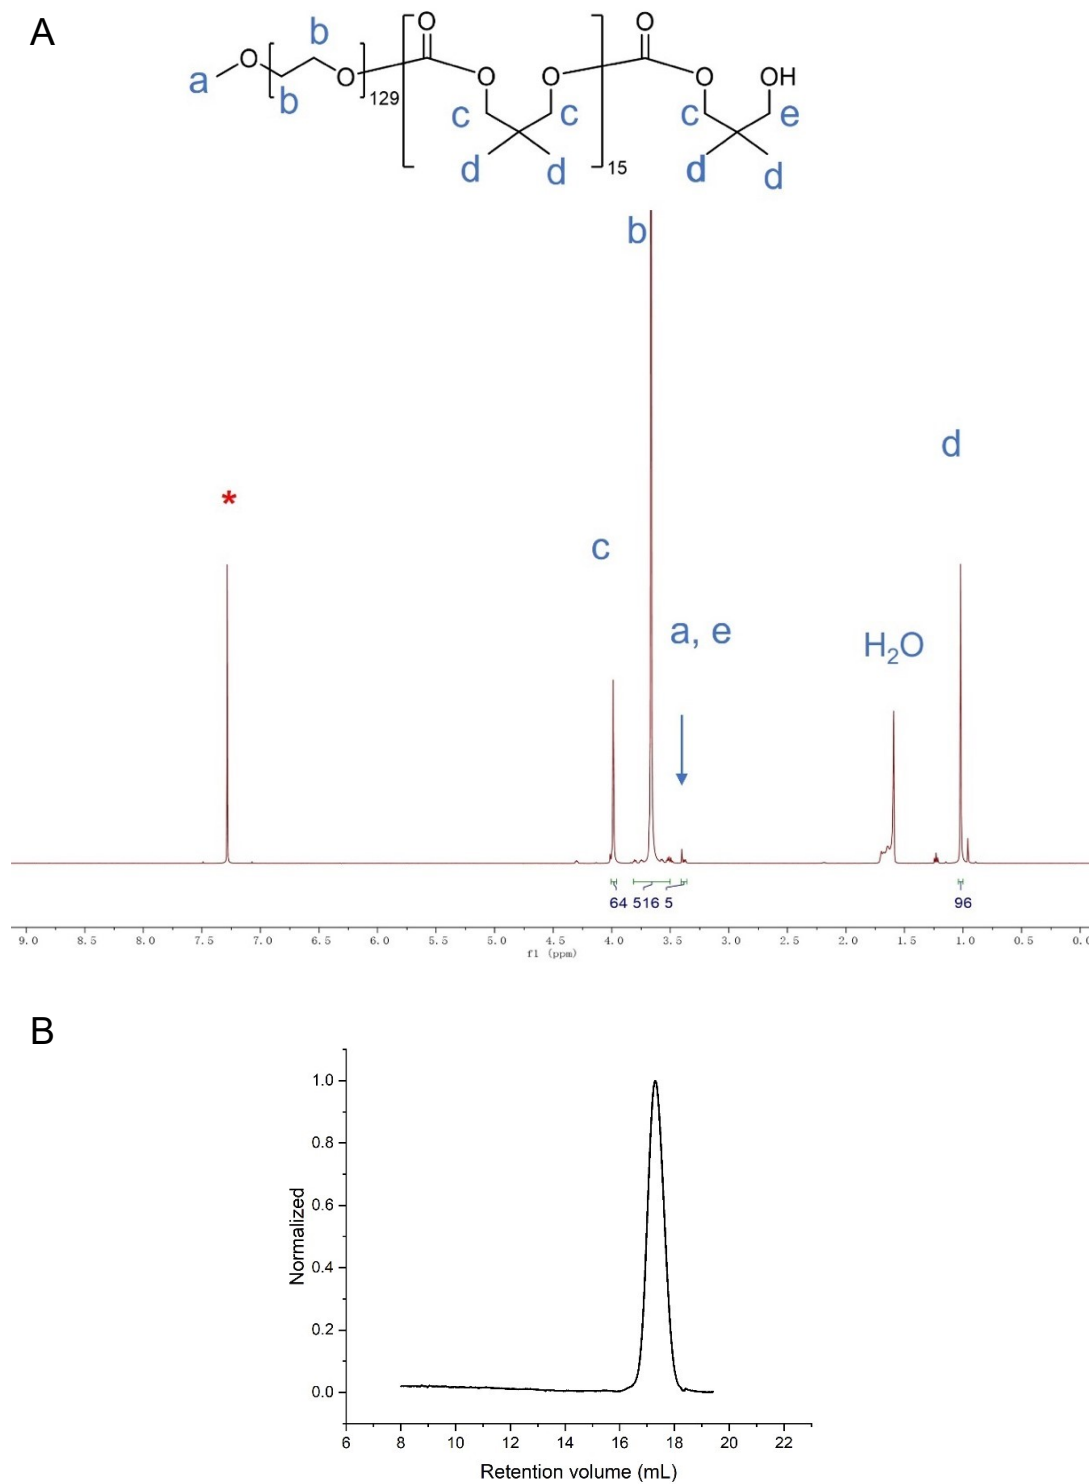

**Figure S16:** (A)  $^1\text{H}$  NMR spectrum (500 MHz,  $\text{CDCl}_3$ ) of  $\text{PDTC}_{16}\text{-}b\text{-PEG}_{129}$ . Deuterated solvent residual signal denoted by \*. (B) GPC chromatogram of  $\text{PDTC}_{16}\text{-}b\text{-PEG}_{129}$  using  $\text{Bu}_4\text{NBr/THF}$  (1% v/v) as the eluent.

### Synthesis of PDTC<sub>28</sub>-*b*-PEG<sub>130</sub>

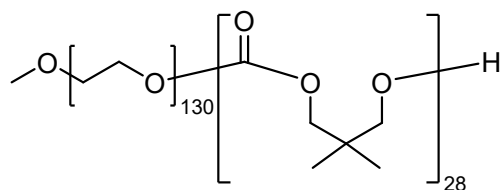

In the nitrogen-filled glovebox, PEG<sub>135</sub> (50 mg, 1 equiv) and DTC (39 mg, 40 equiv), were added to an oven-dried 2 mL vial equipped with a magnetic bar and dissolved in 300  $\mu$ L of anhydrous DCM. A solution of DBU in DCM (15  $\mu$ L, 100 mg/mL, 1 equiv) was added via pipette and the vial was capped. The reaction mixture was stirred for 24 h at room temperature and then quenched with an excess of benzoic acid (15 mg). The reaction mixture was precipitated three times into 45 mL of ice-cold MeOH and collected by centrifugation. After drying in vacuo overnight, the block polymer was obtained as a white solid (77 mg, 94%).

**GPC:**  $M_n = 11,750 \text{ g mol}^{-1}$ ,  $D_M = 1.07 M_n$  (NMR) =  $9,400 \text{ g mol}^{-1}$ .

**<sup>1</sup>H NMR (500 MHz, CDCl<sub>3</sub>):**  $\delta$  (ppm) = 3.99 (s, 112H, H<sub>c</sub>), 3.67 (s, 518H, H<sub>b</sub>), 3.40 (m, 5H, H<sub>a</sub> and H<sub>e</sub>), 1.02 (s, 168H, H<sub>d</sub>).

The DP<sub>n</sub> value of the PDTC block was determined by comparing the relative integration of the methoxy end-group of PEG (at 3.40 ppm, H<sub>a</sub>) with the integration of the methylene protons adjacent to the carbonate carbons (at 3.99 ppm) in the PDTC segment.

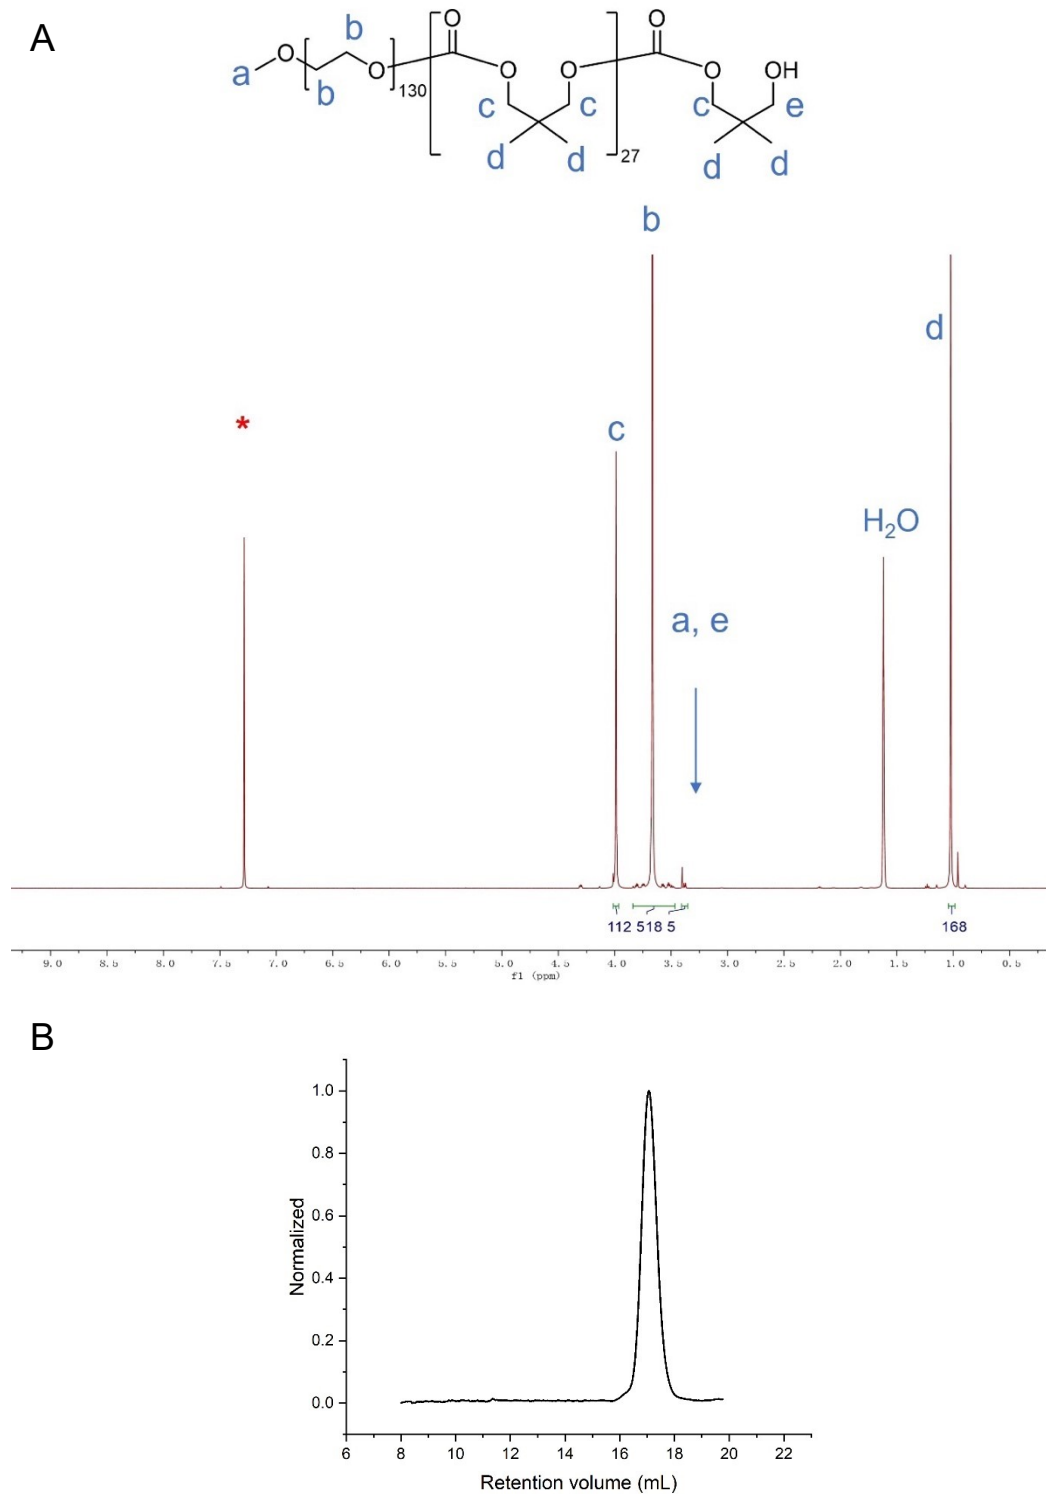

**Figure S17:** (A)  $^1\text{H}$  NMR spectrum (500 MHz,  $\text{CDCl}_3$ ) of  $\text{PDTC}_{28}\text{-}b\text{-PEG}_{130}$ . Deuterated solvent residual signal denoted by \*. (B) GPC chromatogram of  $\text{PDTC}_{28}\text{-}b\text{-PEG}_{130}$  using  $\text{Bu}_4\text{NBr/THF}$  (1% v/v) as the eluent.

### Synthesis of PDTC<sub>49</sub>-*b*-PEG<sub>130</sub>

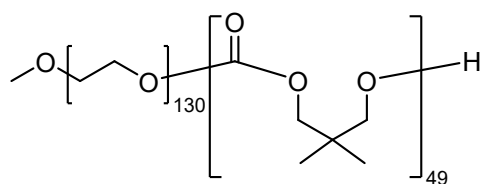

In the nitrogen-filled glovebox, PEG<sub>135</sub> (50 mg, 1 equiv) and DTC (104 mg, 80 equiv) were added to an oven-dried 2 mL vial equipped with a magnetic bar and dissolved in 300  $\mu$ L of anhydrous DCM. A solution of DBU in DCM (15  $\mu$ L, 100 mg/mL, 1 equiv) was added via pipette and the vial was capped. The reaction mixture was stirred for 24 h at room temperature and then quenched with an excess of benzoic acid (15 mg). The reaction mixture was precipitated three times into 45 mL of ice-cold MeOH and collected by centrifugation. After drying in vacuo overnight, the block polymer was obtained as a white solid (94 mg, 58%).

**GPC:**  $M_n = 13,700 \text{ g mol}^{-1}$ ,  $D_M = 1.06$ ,  $M_n \text{ (NMR)} = 12,140 \text{ g mol}^{-1}$ .

**<sup>1</sup>H NMR (500 MHz, CDCl<sub>3</sub>):**  $\delta$  (ppm) = 3.99 (s, 196H, H<sub>c</sub>), 3.67 (s, 520H, H<sub>b</sub>), 3.40 (m, 5H, H<sub>a</sub> and H<sub>e</sub>), 1.02 (s, 294H, H<sub>d</sub>).

The  $DP_n$  value of the PDTC block was determined by comparing the relative integration of the methoxy end-group of PEG (at 3.40 ppm, H<sub>a</sub>) with the integration of the methylene protons adjacent to the carbonate carbons (at 3.99 ppm) in the PDTC segment.



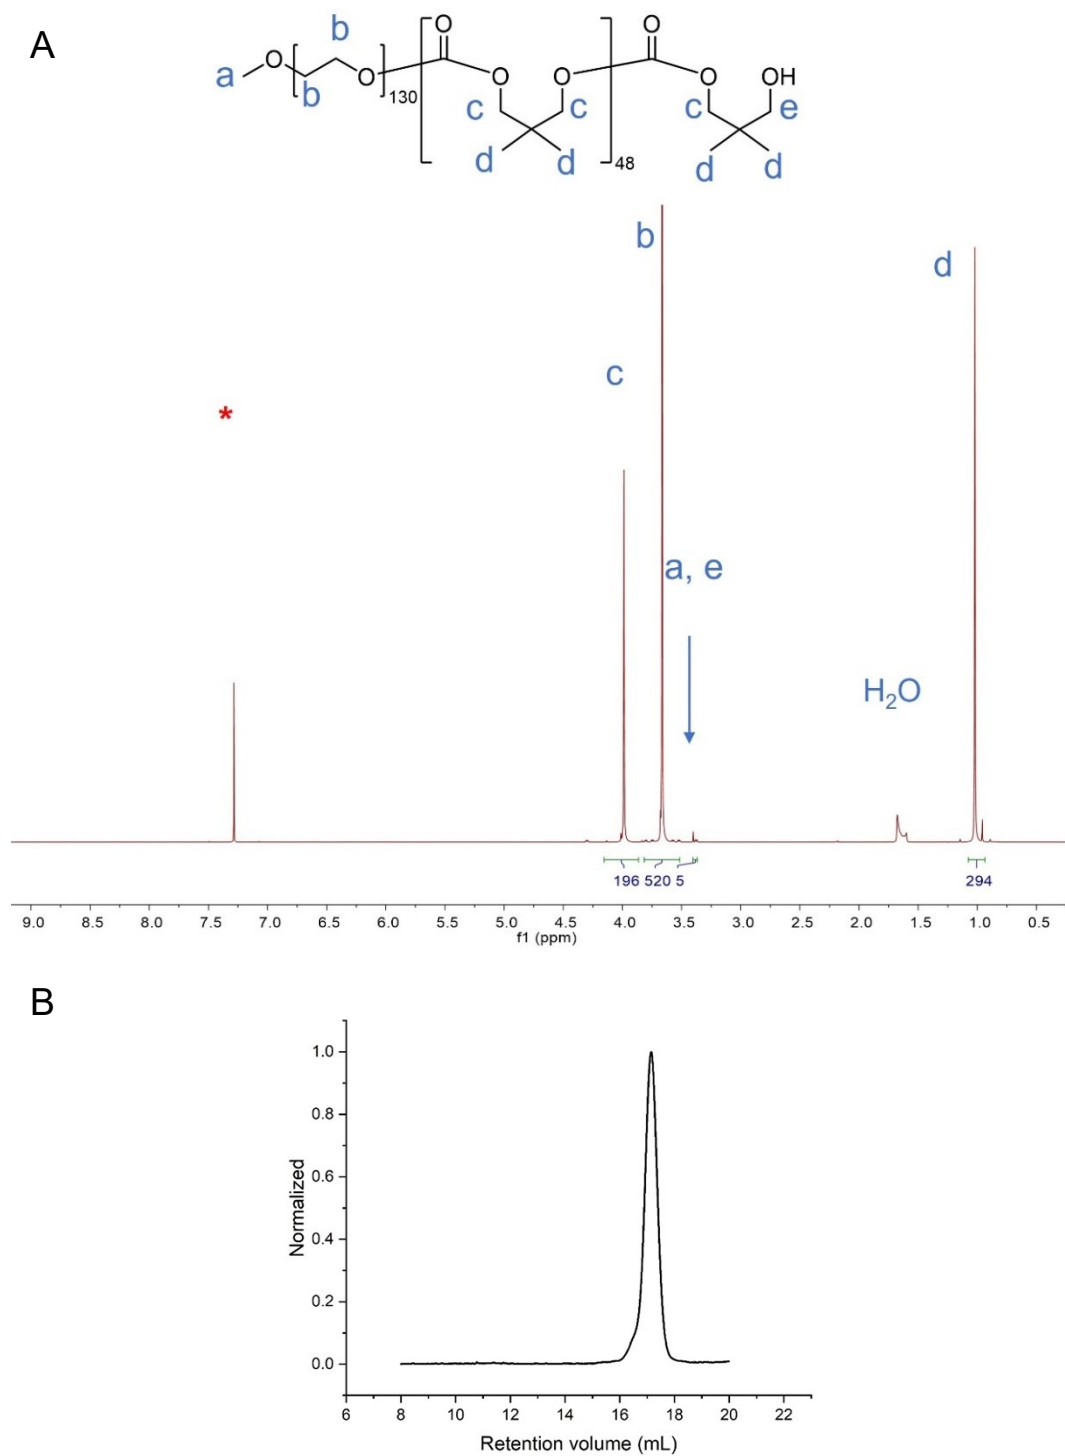

**Figure S18:** (A)  $^1\text{H}$  NMR spectrum (500 MHz,  $\text{CDCl}_3$ ) of  $\text{PDTC}_{49}\text{-}b\text{-PEG}_{130}$ . Deuterated solvent residual signal denoted by \*. (B) GPC chromatogram of  $\text{PDTC}_{49}\text{-}b\text{-PEG}_{130}$  using  $\text{Bu}_4\text{NBr/THF}$  (1% v/v) as the eluent.

### Synthesis of PDTC<sub>92</sub>-*b*-PEG<sub>132</sub>

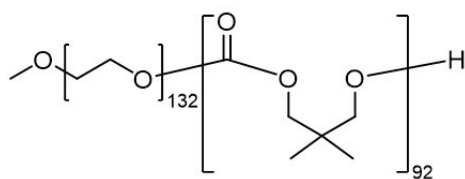

In the nitrogen-filled glovebox, PEG<sub>135</sub> (85 mg, 1 equiv) and DTC (330 mg, 150 equiv) were added to an oven-dried 2 mL vial equipped with a magnetic bar and dissolved in 480  $\mu$ L of anhydrous DCM. A solution of DBU in DCM (20  $\mu$ L, 100 mg/mL, 0.8 equiv) was added via pipette and the vial was capped. The reaction mixture was stirred for 24 h at room temperature and then quenched with an excess of benzoic acid (15 mg). The reaction mixture was precipitated three times into 45 mL of ice-cold MeOH and collected by centrifugation. After drying in vacuo overnight, the block polymer was obtained as a white solid (270 mg, 63%).

**GPC:**  $M_n = 20,310 \text{ g mol}^{-1}$ ,  $D_M = 1.06$ ,  $M_n \text{ (NMR)} = 17,820 \text{ g mol}^{-1}$ .

**<sup>1</sup>H NMR (500 MHz, CDCl<sub>3</sub>):**  $\delta$  (ppm) = 3.99 (s, 368H, H<sub>c</sub>), 3.67 (s, 530H, H<sub>b</sub>), 3.40 (m, 5H, H<sub>a</sub> and H<sub>e</sub>), 1.02 (s, 550H, H<sub>d</sub>).

The DP<sub>n</sub> value of the PDTC block was determined by comparing the relative integration of the methoxy end-group of PEG (at 3.40 ppm, H<sub>a</sub>) with the integration of the methylene protons adjacent to the carbonate carbons (at 3.99 ppm) in the PDTC segment.

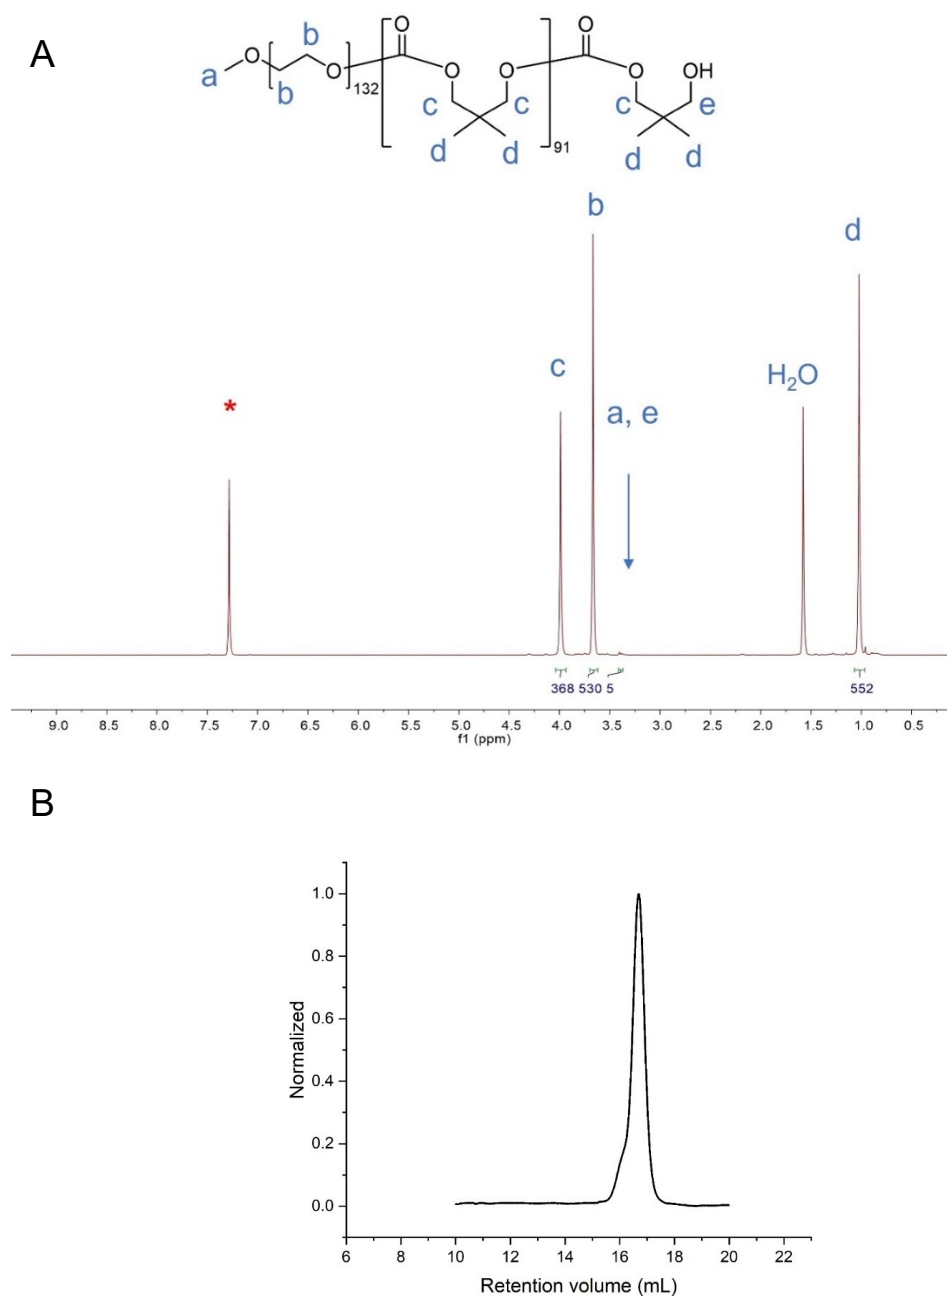

**Figure S19:** (A)  $^1\text{H}$  NMR spectrum (500 MHz,  $\text{CDCl}_3$ ) of  $\text{PDTC}_{92}\text{-}b\text{-PEG}_{132}$ . Deuterated solvent residual signal denoted by \*. (B) GPC chromatogram of  $\text{PDTC}_{92}\text{-}b\text{-PEG}_{132}$  using  $\text{Bu}_4\text{NBr/THF}$  (1% v/v) as the eluent.

### Synthesis of PDEC<sub>21</sub>-*b*-PEG<sub>118</sub>

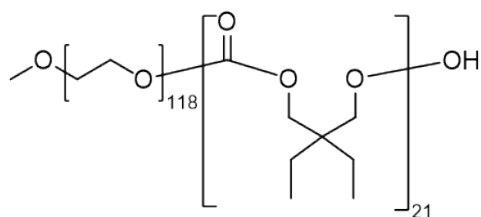

In the nitrogen-filled glovebox, PEG<sub>135</sub> (50 mg, 1 equiv), ETC (48 mg, 30 equiv) and TU (4 mg, 1.2 equiv) were added to an oven-dried 2 mL vial equipped with a magnetic bar and dissolved in 150  $\mu$ L of anhydrous DCM. A solution of DBU in DCM (18  $\mu$ L, 100 mg/mL, 1.2 equiv) was added via pipette and the vial was capped. The reaction mixture was stirred for 24 h at room temperature and then quenched with an excess of benzoic acid (15 mg). The reaction mixture was precipitated three times into 45 mL of ice-cold Et<sub>2</sub>O and collected by centrifugation. After drying in vacuo overnight, the block polymer was obtained as a white solid (81 mg, 76%).

**GPC:**  $M_n = 12,100 \text{ g mol}^{-1}$ ,  $D_M = 1.05$ ,  $M_n \text{ (NMR)} = 8,550 \text{ g mol}^{-1}$ .

**<sup>1</sup>H NMR (500 MHz, CDCl<sub>3</sub>):**  $\delta$  (ppm) = 4.00 (s, 82H, H<sub>c</sub>), 3.64 (s, 460H, H<sub>b</sub>), 3.38 (m, 5H, H<sub>a</sub> and H<sub>f</sub>), 1.36 (s, 84H, H<sub>d</sub>), 0.84 (s, 127H, H<sub>d</sub>).

The DP<sub>n</sub> value of the PDEC block was determined by comparing the relative integration of the methoxy end-group of PEG (at 3.40 ppm, H<sub>a</sub>) with the integration of the methylene protons adjacent to the carbonate carbons (at 4.00 ppm) in the PDEC segment.

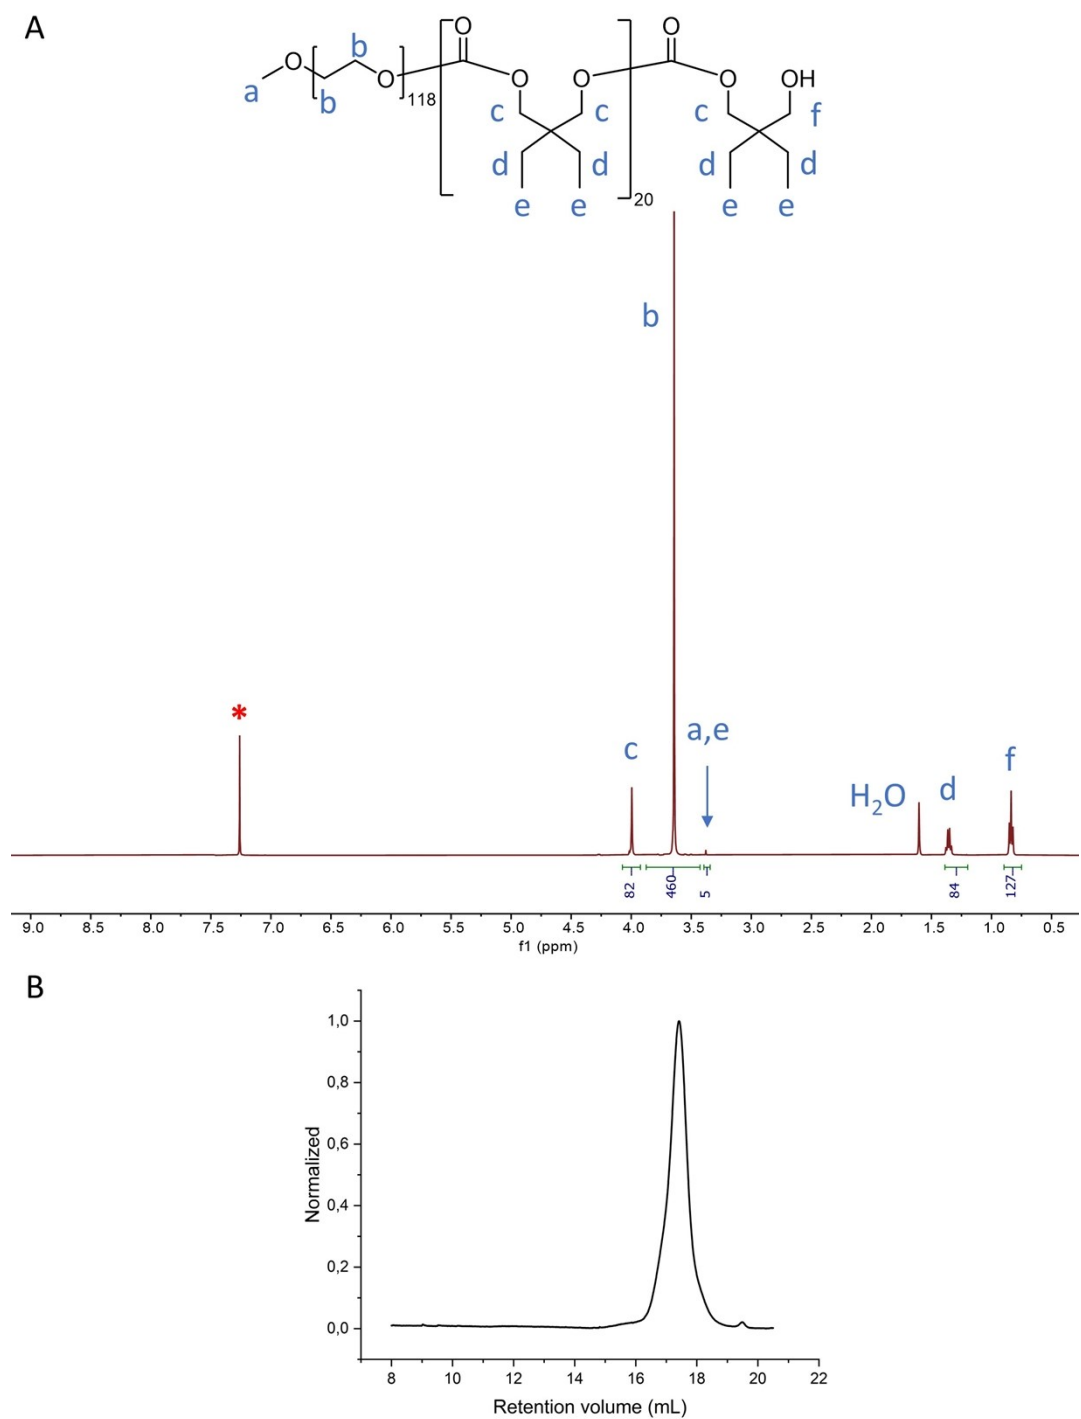

**Figure S20:** (A)  $^1\text{H}$  NMR spectrum (500 MHz,  $\text{CDCl}_3$ ) of  $\text{PDEC}_{21}\text{-}b\text{-PEG}_{118}$ . Deuterated solvent residual signal denoted by \*. (B) GPC chromatogram of  $\text{PDEC}_{21}\text{-}b\text{-PEG}_{118}$  using  $\text{Bu}_4\text{NBr/THF}$  (1% v/v) as the eluent.

### Synthesis of PDEC<sub>31</sub>-*b*-PEG<sub>112</sub>

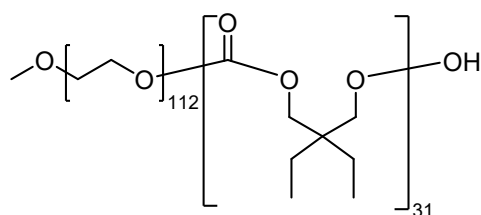

In the nitrogen-filled glovebox, PEG<sub>135</sub> (50 mg, 1 equiv), ETC (79 mg, 50 equiv) and TU (4 mg, 1 equiv) were added to an oven-dried 2 mL vial equipped with a magnetic bar and dissolved in 150  $\mu$ L of anhydrous DCM. A solution of DBU in DCM (18  $\mu$ L, 100 mg/mL, 1.2 equiv) was added via pipette and the vial was capped. The reaction mixture was stirred for 24 h at room temperature and then quenched with an excess of benzoic acid (15 mg). The reaction mixture was precipitated three times into 45 mL of ice-cold Et<sub>2</sub>O and collected by centrifugation. After drying in vacuo overnight, the block polymer was obtained as a white solid (99 mg, 72%).

**GPC:**  $M_n = 13,700 \text{ g mol}^{-1}$ ,  $D_M = 1.05$ ,  $M_n \text{ (NMR)} = 9,900 \text{ g mol}^{-1}$ .

**<sup>1</sup>H NMR (500 MHz, CDCl<sub>3</sub>):**  $\delta$  (ppm) = 4.00 (s, 120H, H<sub>c</sub>), 3.64 (s, 448H, H<sub>b</sub>), 3.37 (m, 5H, H<sub>a</sub> and H<sub>f</sub>), 1.36 (s, 122H, H<sub>d</sub>), 0.84 (s, 183H, H<sub>e</sub>).

The DP<sub>n</sub> value of the PDEC block was determined by comparing the relative integration of the methoxy end-group of PEG (at 3.37 ppm, H<sub>a</sub>) with the integration of the methylene protons adjacent to the carbonate carbons (at 4.00 ppm) in the PDEC segment.

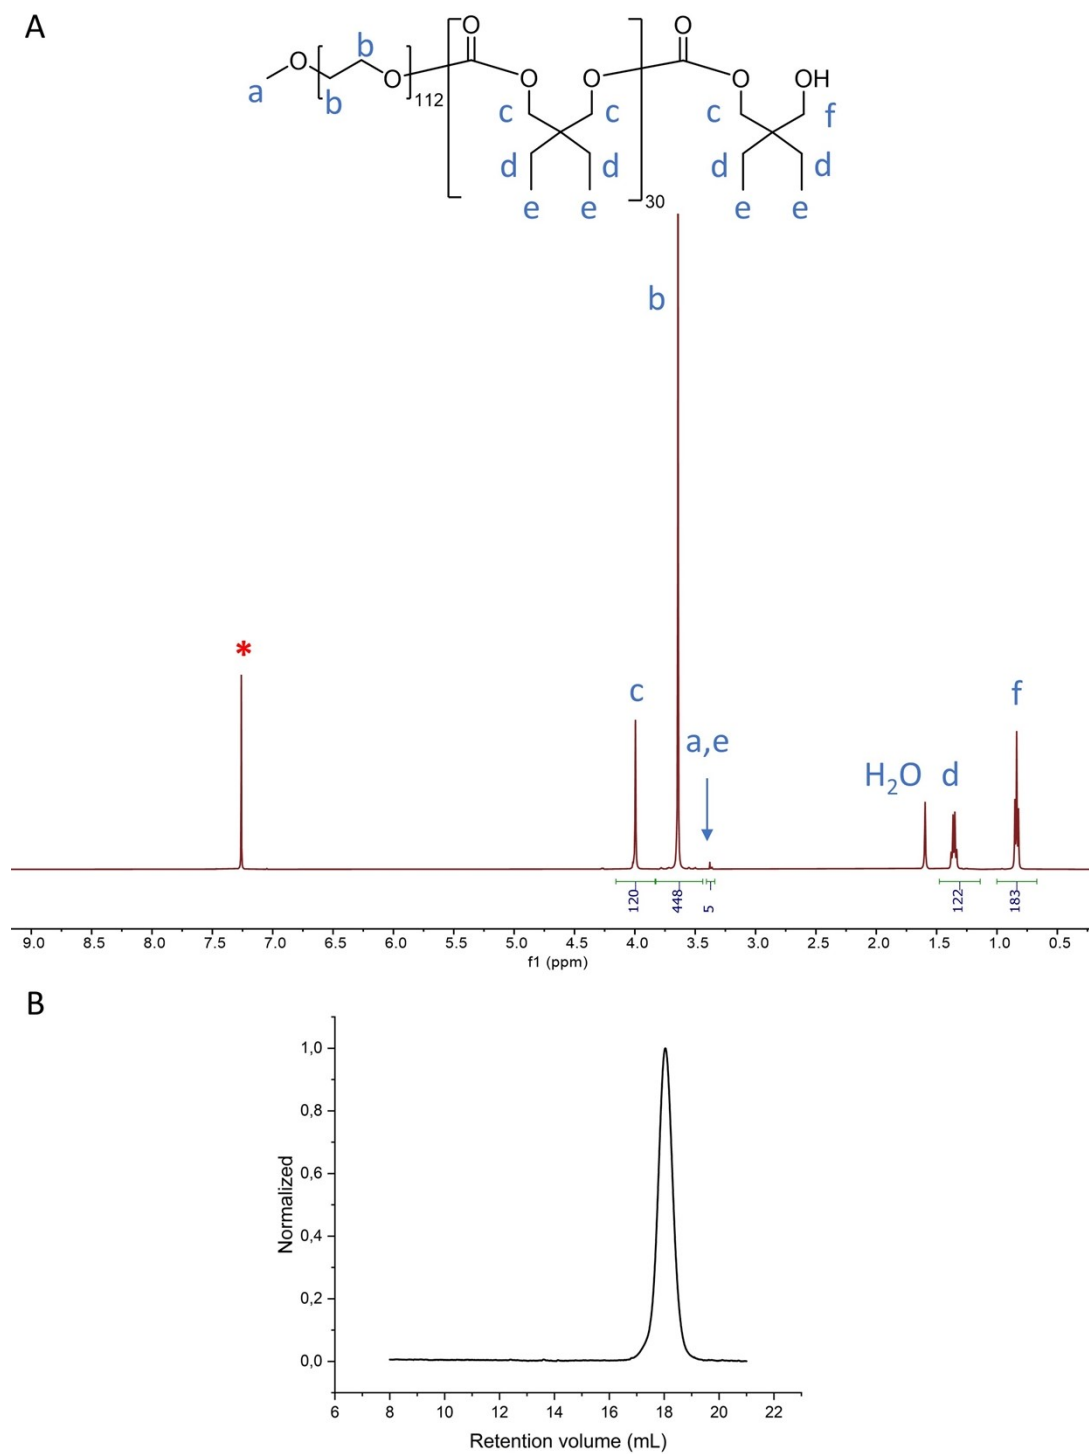

**Figure S21:** (A)  $^1\text{H}$  NMR spectrum (500 MHz,  $\text{CDCl}_3$ ) of  $\text{PDEC}_{31}\text{-}b\text{-PEG}_{112}$ . Deuterated solvent residual signal denoted by \*. (B) GPC chromatogram of  $\text{PDEC}_{31}\text{-}b\text{-PEG}_{112}$  using  $\text{Bu}_4\text{NBr/THF}$  (1% v/v) as the eluent.

### Synthesis of PDEC<sub>52</sub>-*b*-PEG<sub>105</sub>

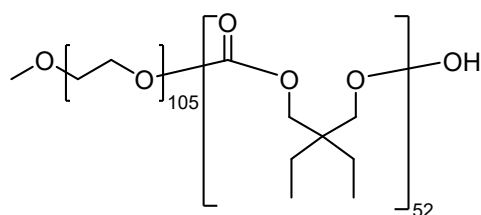

In the nitrogen-filled glovebox, PEG<sub>135</sub> (50 mg, 1 equiv), ETC (126 mg, 80 equiv) and TU (4 mg, 1 equiv) were added to an oven-dried 2 mL vial equipped with a magnetic bar and dissolved in 150  $\mu$ L of anhydrous DCM. A solution of DBU in DCM (18  $\mu$ L, 100 mg/mL, 1.2 equiv) was added via pipette and the vial was capped. The reaction mixture was stirred for 24 h at room temperature and then quenched with an excess of benzoic acid (15 mg). The reaction mixture was precipitated three times into 45 mL of ice-cold Et<sub>2</sub>O and collected by centrifugation. After drying in vacuo overnight, the block polymer was obtained as a white solid (140 mg, 75%).

**GPC:**  $M_n = 16,800 \text{ g mol}^{-1}$ ,  $D_M = 1.07$ ,  $M_n \text{ (NMR)} = 12,900 \text{ g mol}^{-1}$ .

**<sup>1</sup>H NMR (500 MHz, CDCl<sub>3</sub>):**  $\delta$  (ppm) = 3.99 (s, 204H, H<sub>c</sub>), 3.64 (s, 421H, H<sub>b</sub>), 3.37 (m, 5H, H<sub>a</sub> and H<sub>f</sub>), 1.36 (s, 206H, H<sub>d</sub>), 0.84 (s, 309H, H<sub>d</sub>).

The DP<sub>n</sub> value of the PDEC block was determined by comparing the relative integration of the methoxy end-group of PEG (at 3.37 ppm, H<sub>a</sub>) with the integration of the methylene protons adjacent to the carbonate carbons (at 3.99 ppm) in the PDEC segment.



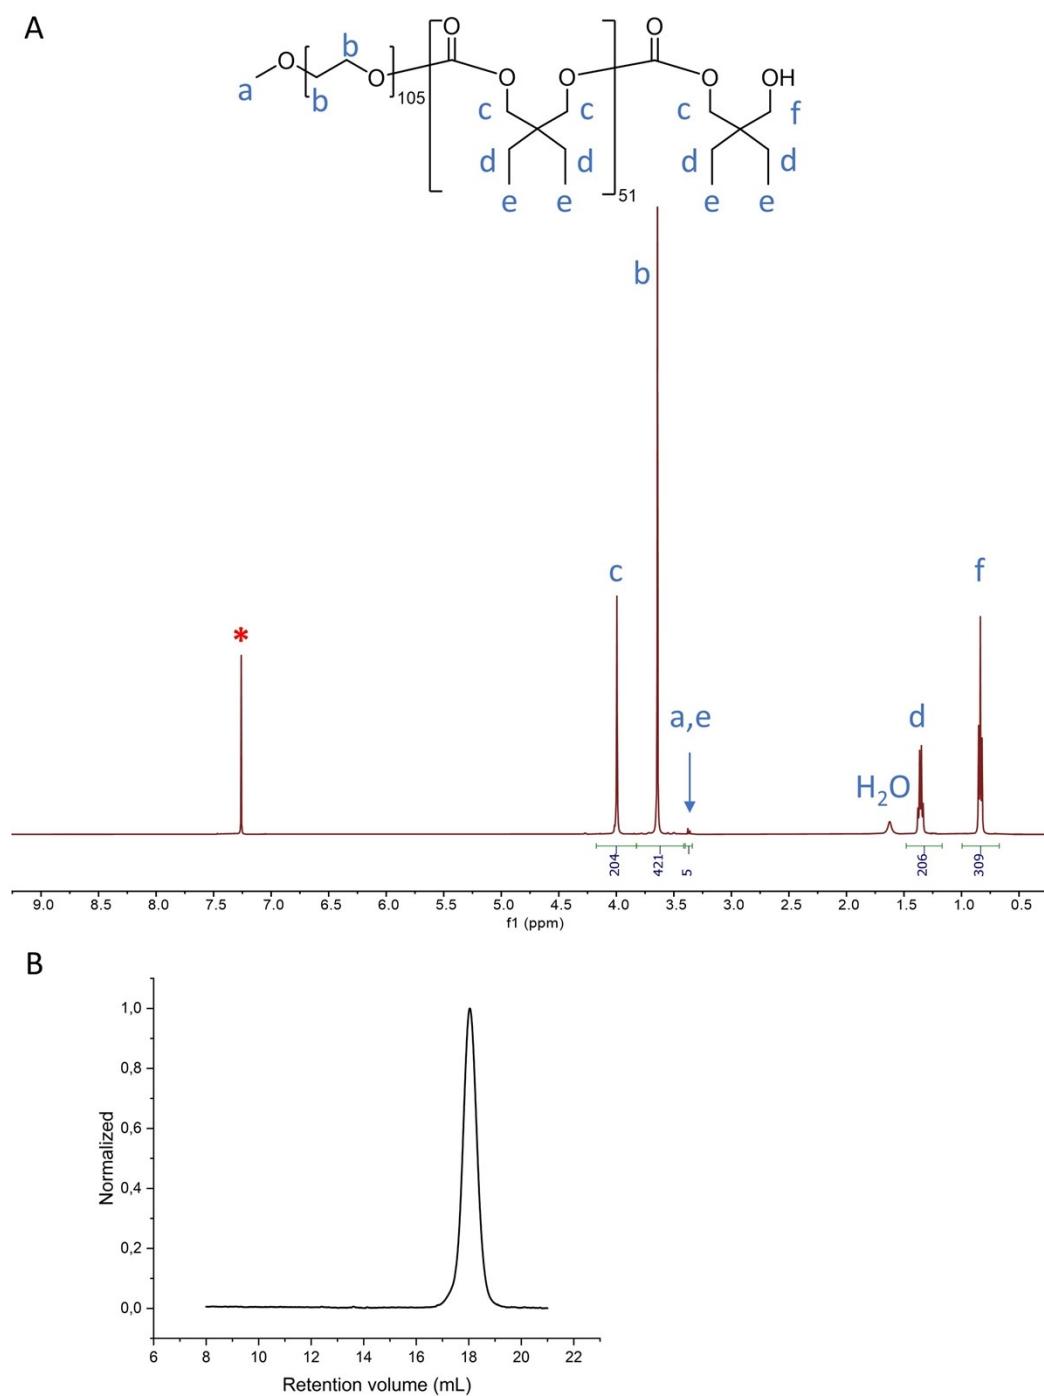

**Figure S22:** (A)  $^1\text{H}$  NMR spectrum (500 MHz,  $\text{CDCl}_3$ ) of  $\text{PDEC}_{52}\text{-}b\text{-PEG}_{105}$ . Deuterated solvent residual signal denoted by \*. (B) GPC chromatogram of  $\text{PDEC}_{52}\text{-}b\text{-PEG}_{105}$  using  $\text{Bu}_4\text{NBr/THF}$  (1% v/v) as the eluent.

### Synthesis of PDEC<sub>95</sub>-*b*-PEG<sub>98</sub>

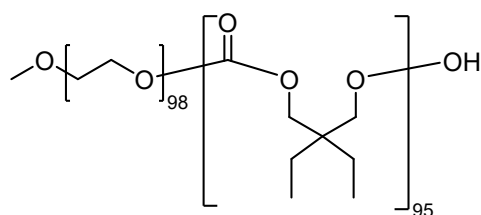

In the nitrogen-filled glovebox, PEG<sub>135</sub> (50 mg, 1 equiv), ETC (237 mg, 150 equiv) and TU (6 mg, 1.5 equiv) were added to an oven-dried 2 mL vial equipped with a magnetic bar and dissolved in 200  $\mu$ L of anhydrous DCM. A solution of DBU in DCM (23  $\mu$ L, 100 mg/mL, 1.5 equiv) was added via pipette and the vial was capped. The reaction mixture was stirred for 24 h at room temperature and then quenched with an excess of benzoic acid (15 mg). The reaction mixture was precipitated three times into 45 mL of ice-cold Et<sub>2</sub>O and collected by centrifugation. After drying in vacuo overnight, the block polymer was obtained as a white solid (227 mg, 76%).

**GPC:**  $M_n = 22,200 \text{ g mol}^{-1}$ ,  $D_M = 1.09$ ,  $M_n \text{ (NMR)} = 19,400 \text{ g mol}^{-1}$ .

**<sup>1</sup>H NMR (500 MHz, CDCl<sub>3</sub>):**  $\delta$  (ppm) = 4.00 (s, 369H, H<sub>c</sub>), 3.64 (s, 392H, H<sub>b</sub>), 3.37 (m, 5H, H<sub>a</sub> and H<sub>f</sub>), 1.36 (s, 380H, H<sub>d</sub>), 0.84 (s, 568H, H<sub>e</sub>).

The DP<sub>n</sub> value of the PDEC block was determined by comparing the relative integration of the methoxy end-group of PEG (at 3.37 ppm, H<sub>a</sub>) with the integration of the methylene protons adjacent to the carbonate carbons (at 4.00 ppm) in the PDEC segment.

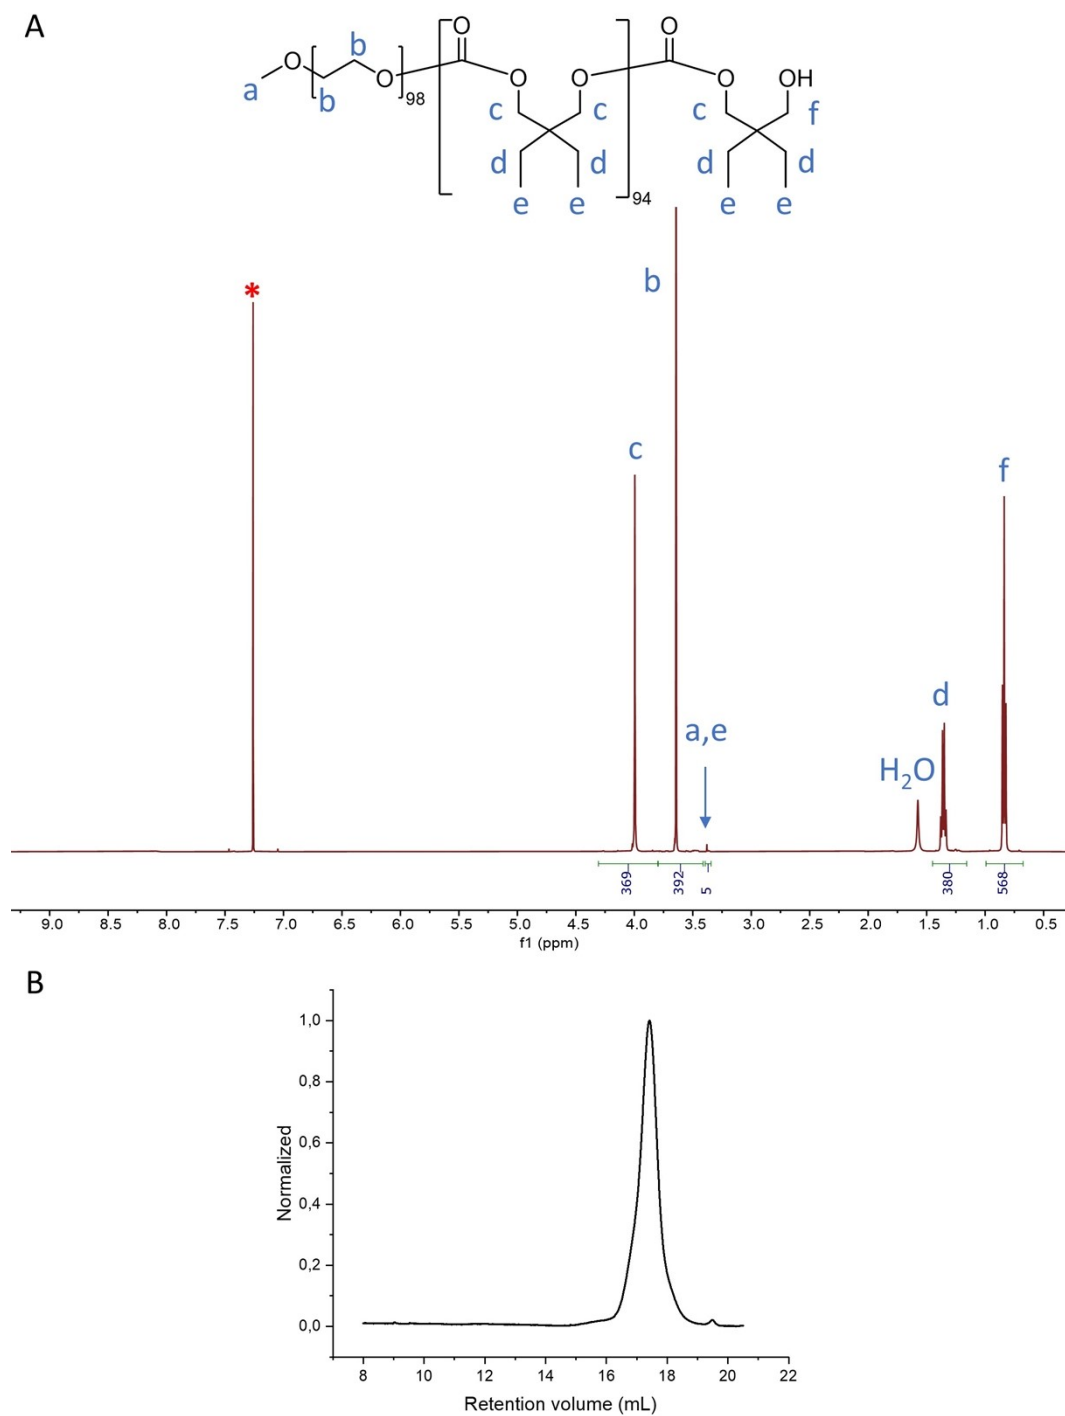

**Figure S23:** (A)  $^1\text{H}$  NMR spectrum (500 MHz,  $\text{CDCl}_3$ ) of  $\text{PDEC}_{95}\text{-}b\text{-PEG}_{98}$ . Deuterated solvent residual signal denoted by \*. (B) GPC chromatogram of  $\text{PDEC}_{95}\text{-}b\text{-PEG}_{98}$  using  $\text{Bu}_4\text{NBr/THF}$  (1% v/v) as the eluent.

**Table S2:** Synthesis of PDEC-*b*-PEG BCPs via organometallic ROP
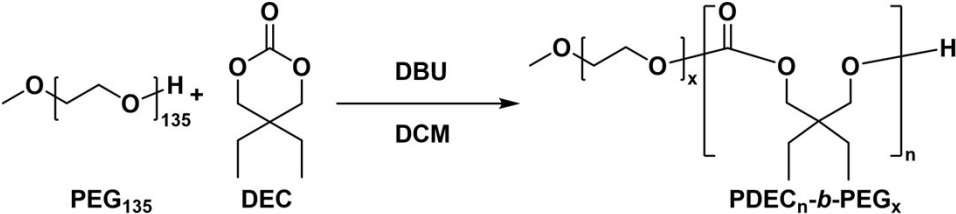

| Block Polymer                                     | PDEC DP <sub>n</sub> <sup>a</sup> | M <sub>n</sub> (g/mol) <sup>b</sup> | Đ <sub>m</sub> <sup>b</sup> | PDEC:PEG block ratio <sup>a</sup> |
|---------------------------------------------------|-----------------------------------|-------------------------------------|-----------------------------|-----------------------------------|
| PDEC <sub>21</sub> - <i>b</i> -PEG <sub>118</sub> | 21                                | 12 100                              | 1.05                        | 1:6                               |
| PDEC <sub>31</sub> - <i>b</i> -PEG <sub>112</sub> | 31                                | 13 700                              | 1.05                        | 1:4                               |
| PDEC <sub>52</sub> - <i>b</i> -PEG <sub>105</sub> | 52                                | 16 800                              | 1.07                        | 1:2                               |
| PDEC <sub>95</sub> - <i>b</i> -PEG <sub>98</sub>  | 95                                | 22 200                              | 1.09                        | 1:1                               |

<sup>a</sup>Determined by <sup>1</sup>H NMR spectroscopy. <sup>b</sup>Determined by GPC versus polystyrene standards.

### 3. Self-Assembly Procedures

Compositions of all solvents for self-assembly are given as v:v. All of TEM images were obtained after the nanoplatelets were negatively stained with uranyl acetate (3 wt % in MeOH).

#### Self-Assembly Procedure of PDEC-*b*-PEG Block Polymer in 15:85 THF: MeOH

20 μL of THF and 10 μL of a 10 mg/mL solution PDEC<sub>21</sub>-*b*-PEG<sub>118</sub> in THF were added to 170 μL of MeOH in a vial. The resulting solution (0.5 mg/mL in 15:85 THF: MeOH) was manually shaken for ~10 s and annealed for 2 h at 70 °C. Then, the solution was cooled to 23 °C over 2 h, and aged for 24h. The resulting solution was analyzed by TEM. A similar procedure was conducted with other block polymers, including PDEC<sub>31</sub>-*b*-PEG<sub>112</sub>, PDEC<sub>52</sub>-*b*-PEG<sub>105</sub> and PDEC<sub>95</sub>-*b*-PEG<sub>98</sub>.

#### Self-Assembly Procedure of PDTC-*b*-PEG Block Polymer in 15:85 THF: MeOH

100 μL of THF and 50 μL of a 10 mg/mL solution PDTC<sub>10</sub>-*b*-PEG<sub>124</sub> in THF were added to 8500 μL of MeOH in a vial. The resulting solution (0.5 mg/mL in 15:85 THF: MeOH) was manually shaken for ~10 s and annealed for 2 h at 70 °C. Then, the solution was cooled to 23 °C over 2 h, and aged for 24 h. The resulting solution was analyzed

by TEM. A similar procedure was conducted with other block polymers, including PDTC<sub>16</sub>-*b*-PEG<sub>129</sub>, PDTC<sub>28</sub>-*b*-PEG<sub>130</sub>, PDTC<sub>49</sub>-*b*-PEG<sub>130</sub>, PDTC<sub>92</sub>-*b*-PEG<sub>132</sub>.

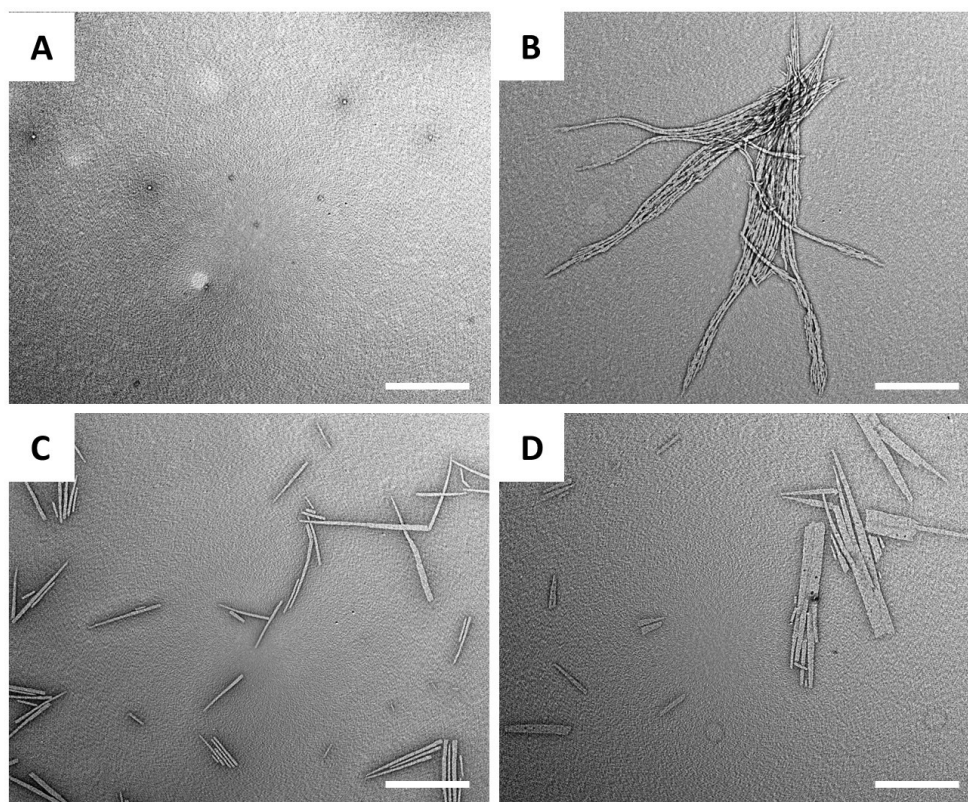

**Figure S24:** TEM images of micelles prepared via homogeneous nucleation in MeOH:THF ( v:v) 85:15 at 0.5 mg/mL by heating polymer samples to 70 °C for 2 h before cooling to 23 °C over a period of 2 h and aging over 24 h. (A) PDEC<sub>21</sub>-*b*-PEG<sub>118</sub> (B) PDEC<sub>31</sub>-*b*-PEG<sub>112</sub>. (C) PDEC<sub>52</sub>-*b*-PEG<sub>105</sub>. (D) PDEC<sub>95</sub>-*b*-PEG<sub>98</sub>. Scale bars = 1000 nm. TEM images were stained with uranyl acetate (3 wt % in MeOH)

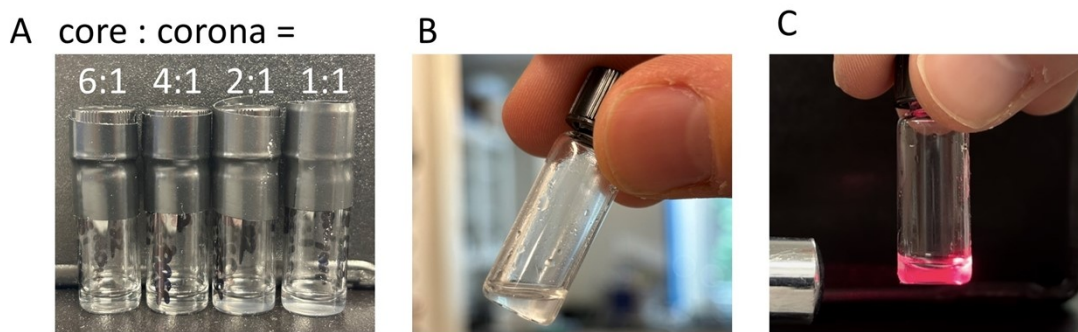

**Figure S25:** (A) Photos of the homogeneous nucleation experiments in MeOH:THF ( v:v) 85:15 at 0.5 mg/mL by heating polymer samples to 70 °C for 2 h before cooling to 23 °C over a period of 2 h and aging over 24 h. (B) Visible precipitation of PDEC<sub>95</sub>-*b*-PEG<sub>98</sub> (core:corona = 1:1). (C) Tyndall effect of 0.5 mg/mL PDEC<sub>95</sub>-*b*-PEG<sub>98</sub> in MeOH:THF (v:v) 85:15 by using a red laser pointer as a light source, highlighting the poor colloidal stability of the nanostructures.

### **Self-assembly procedure of PDTC-*b*-PEG block polymer in 5:95 THF: MeOH**

50  $\mu\text{L}$  of a 10 mg/mL solution PDTC<sub>92</sub>-*b*-PEG<sub>132</sub> in THF were added to the 950  $\mu\text{L}$  of MeOH in a vial. The resulting solution (0.5 mg/mL in 5:95 THF: MeOH) was manually shaken for  $\sim 10$  s and annealed for 2 h at 70 °C. Then, the solution was cooled to 23 °C over 2 h and aged for 24 h. The resulting solution was analyzed by TEM.

### **Preparation of PDTC<sub>92</sub>-*b*-PEG<sub>132</sub> seed micelles by sonication**

The polydisperse 2D platelet micelles derived from PDTC<sub>92</sub>-*b*-PEG<sub>132</sub> were fragmented by ultrasonication at 0 °C for 3 h using an ultrasonication processor. The resulting seed micelles were imaged by TEM.

### **Preparation of PDTC<sub>92</sub>-*b*-PEG<sub>132</sub> low disperse platelets with controlled area by seeded growth (living CDSA)**

For seeded growth micelles with  $m_{\text{unimer}}/m_{\text{seed}} \leq 50$ : aliquots of PDTC<sub>92</sub>-*b*-PEG<sub>132</sub> unimer (10 mg/mL in THF), equivalent to corresponding  $m_{\text{unimer}}/m_{\text{seed}}$ , were added to diluted seed platelet solutions in 5:95 THF: MeOH (400  $\mu\text{L}$ ) at 40 °C. The solution was shaken for about 10 s and aged for 24 h at 23 °C.

For seeded growth micelles with  $m_{\text{unimer}}/m_{\text{seed}}$  ratios of 100, 200: aliquots of PDTC<sub>92</sub>-*b*-PEG<sub>132</sub> unimer (10 mg/mL in THF), equivalent to corresponding  $m_{\text{unimer}}/m_{\text{seed}}$ , were added to diluted seed nanofiber solution in 5:95 THF: MeOH (400  $\mu\text{L}$ ) at 40 °C. The unimer was added in intervals of 50  $m_{\text{unimer}}/m_{\text{seed}}$  every 24 h.

The statistical analysis of contour areas measurements for PDTC<sub>92</sub>-*b*-PEG<sub>132</sub> nanoplatelets is shown in **Figure 3**.

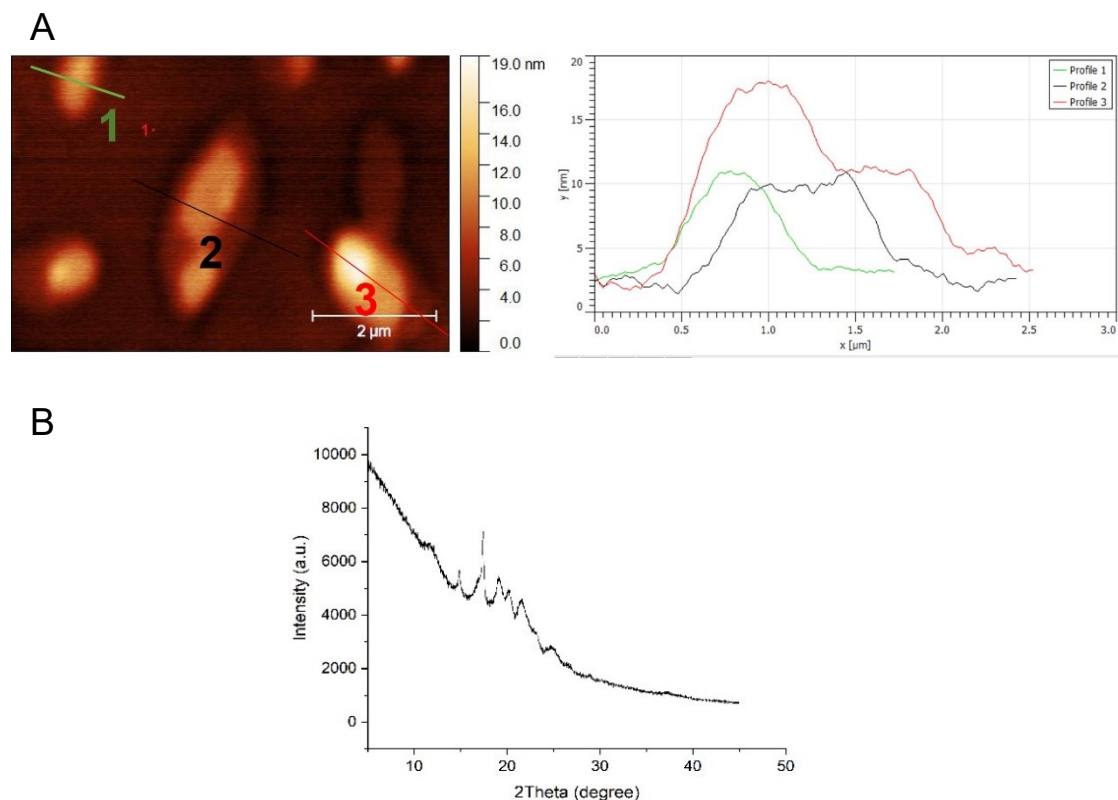

**Figure S26:** (A) Atomic force microscopy (AFM) images of 2D platelets prepared from MeOH:THF = 95:5 at 0.5 mg/mL by heating polymer samples to 70 °C before cooling to 23 °C over a period of 2 h and aging for 24 h. The profile showed a height of about 8 nm. (B) The X-ray diffraction (XRD) measurement was performed on thin films cast from nanoplatelet solutions.

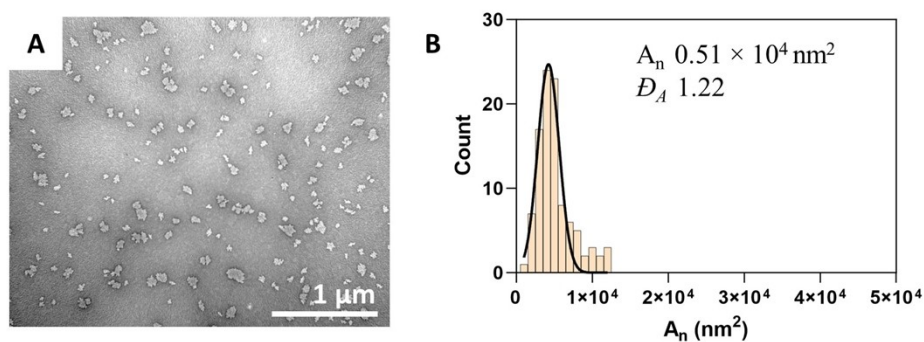

**Figure S27:** (A) TEM image of 2D seeds with an area of  $0.51 \times 10^4 \text{ nm}^2$  ( $D_A = 1.22$ ) and a concentration of 0.5 mg/ml in MeOH: THF = 95: 5 prepared by sonication of disperse platelets from PDTC<sub>92</sub>-*b*-PEG<sub>132</sub> for 3 h at 0 °C and (B) the contour area histogram for the corresponding platelets.



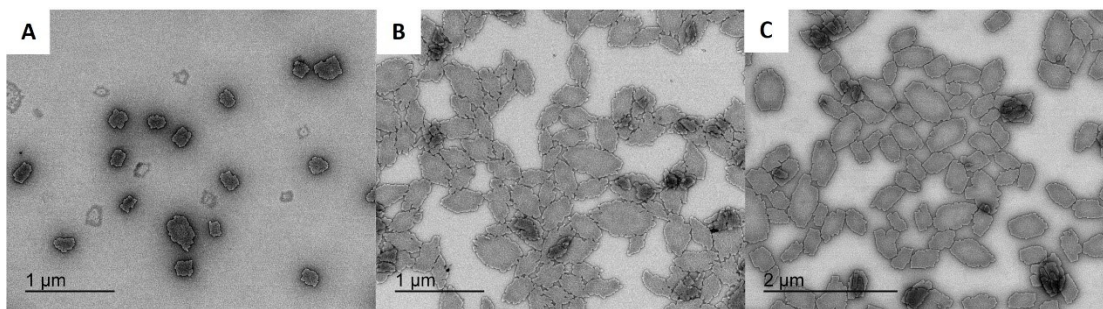

**Figure S28:** TEM images of 2D platelet micelles of PDTC<sub>92</sub>-*b*-PEG<sub>132</sub> prepared by a seeded growth approach with unimer-to-seed mass ratios of 20 at different temperatures. PDTC<sub>92</sub>-*b*-PEG<sub>132</sub> unimer (10 mg/mL) in THF was added to the seed micelles in MeOH (0.025 mg/mL, 0.4 mL) at different temperatures of (A) 23 °C, (B) 30 °C, (C) 40 °C. The samples were stained with uranyl acetate (3 wt % in MeOH).

### Synthesis of PDTC<sub>128</sub>-*b*-P2VP<sub>61</sub>

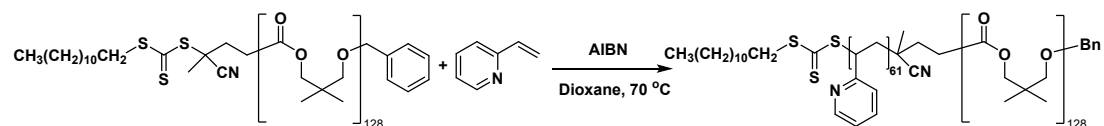

PDTC<sub>128</sub>-CTA (50 mg, 1 equiv), 2-vinylpyridine (189 mg, 400 equiv), and AIBN (0.3 mg, 0.2 equiv) were dissolved in dioxane (2 mL) in a Schlenk tube. The reaction mixture was stirred for 20 min at 23 °C followed by three freeze-pump-thaw cycles. The reaction mixture was placed in a preheated heating oil bath at 70 °C and stirred for 6.5 h. Then, the reaction was quenched by submersion in liquid nitrogen. The product was precipitated three times in ice-cold hexane. The product was dried overnight in vacuo to yield PDTC<sub>128</sub>-*b*-P2VP<sub>61</sub> as a light-yellow solid (70 mg, 15%).

(CTA = 4-Cyano-4-[(dodecylsulfanylthiocarbonyl)sulfanyl]pentanoic acid)

**GPC:**  $M_n = 29\,080\text{ g mol}^{-1}$ ,  $D_M = 1.10$ ,  $M_n\text{ (NMR)} = 26\,390\text{ g mol}^{-1}$ .

**<sup>1</sup>H NMR (500 MHz, CDCl<sub>3</sub>):**  $\delta$  (ppm) = 8.52 – 8.08 (m, 61H, H<sub>e</sub>), 7.42 – 7.37 (m, 5H, H<sub>a</sub>), 7.16 (m, J = 88.8 Hz, 61H, H<sub>e</sub>), 6.83 (m, J = 40.2 Hz, 61H, H<sub>e</sub>), 6.50 (m, 61H, H<sub>e</sub>), 5.18 (s, 2H, H<sub>b</sub>), 3.99 (s, 512H, H<sub>d</sub>), 2.09 (d, 183H, H<sub>f</sub>), 1.28 (s, 22H, H<sub>g</sub>), 1.02 (s, 774H, H<sub>c</sub>).

The DP<sub>n</sub> of the PDTC block was determined by comparing the relative integrations of the methylene proton adjacent to the carbonate carbons (H<sub>d</sub>) in the PDTC segment with the integration of the methylene group of benzyl end-group (at 5.17 ppm, H<sub>a</sub>). The DP<sub>n</sub> of the P2VP block was determined by comparing the integrations of the pyridyl protons



(H<sub>e</sub>) in the P2VP segment with the integration of the methylene group of benzyl end-group (at 5.17 ppm, H<sub>a</sub>).

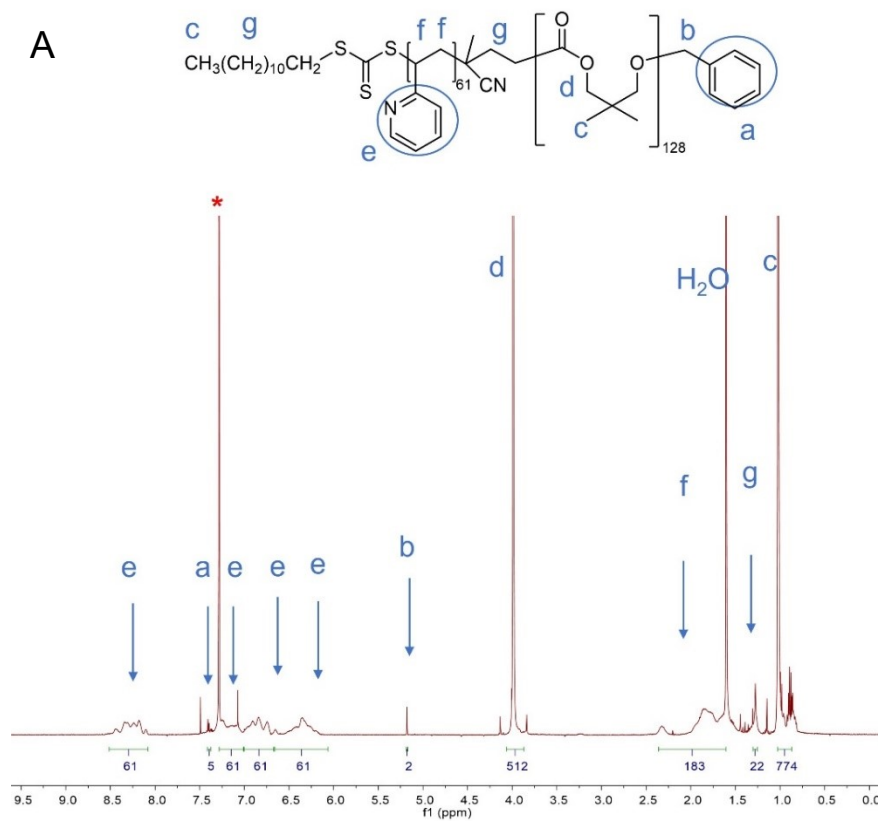

**B**

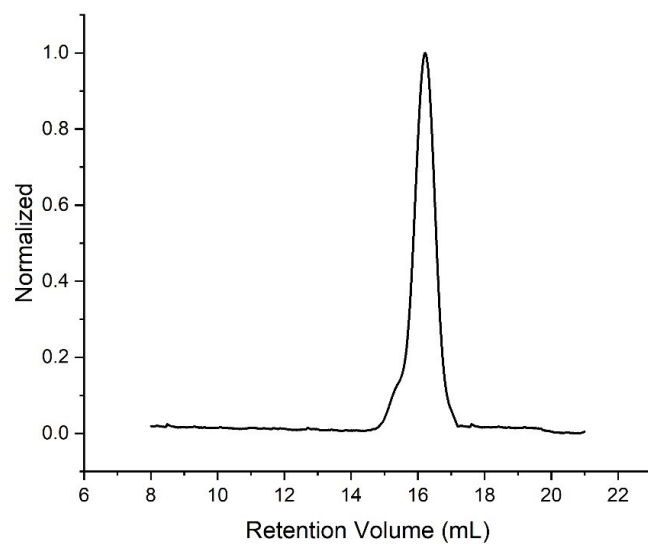

**Figure S29:** (A) <sup>1</sup>H NMR spectrum (500 MHz, CDCl<sub>3</sub>) of PDTC<sub>128</sub>-*b*-P2VP<sub>61</sub>. Deuterated solvent residual signal denoted by \*. (B) GPC chromatogram of PDTC<sub>128</sub>-*b*-P2VP<sub>61</sub> using Bu<sub>4</sub>NBr/THF (1% v/v) was used as the eluent.

### **PDTC<sub>92</sub>-*b*-PEG<sub>132</sub> -*m*- PDTC<sub>128</sub>-*b*-P2VP<sub>61</sub> Coblock Comicelles**

To 400  $\mu\text{L}$  of preformed PDTC<sub>92</sub>-*b*-PEG<sub>132</sub> platelet solution ( $A_n = 10.09 \times 10^4 \text{ nm}^2$ ,  $D_A = 1.07$ , 0.067 mg/mL, MeOH: THF 95:5 v:v), 25  $\mu\text{L}$  of a PDTC<sub>128</sub>-*b*-P2VP<sub>61</sub> unimer solution (10 mg/mL in THF) were added at 40 °C. The solution was manually shaken for  $\sim 10$  s and aged for 24 h at 23 °C. The resulting 2D platelets were analyzed by TEM after staining as shown in **Figure S30B**.

### **PDTC<sub>92</sub>-*b*-PEG<sub>132</sub> -*m*- PDTC<sub>128</sub>-*b*-P2VP<sub>61</sub> -*m*- PDTC<sub>92</sub>-*b*-PEG<sub>132</sub>-Dy Triblock Comicelles**

To 400  $\mu\text{L}$  of a prepared PDTC<sub>92</sub>-*b*-PEG<sub>132</sub> -*m*- PDTC<sub>128</sub>-*b*-P2VP<sub>61</sub> coblock comicelles solution ( $A_n = 45.58 \times 10^4 \text{ nm}^2$ ,  $D_A = 1.07$ , 0.15 mg/mL, MeOH:THF 95:5 v:v) was added 1.56  $\mu\text{L}$  of a PDTC<sub>92</sub>-*b*-PEG<sub>132</sub>-Dy unimer solution (10 mg/mL in THF) at 40 °C. The solution was manually shaken for  $\sim 10$  s and aged for 24 h at 23 °C. The resulting 2D platelets were analyzed by TEM after staining as shown in **Figure 30C**.

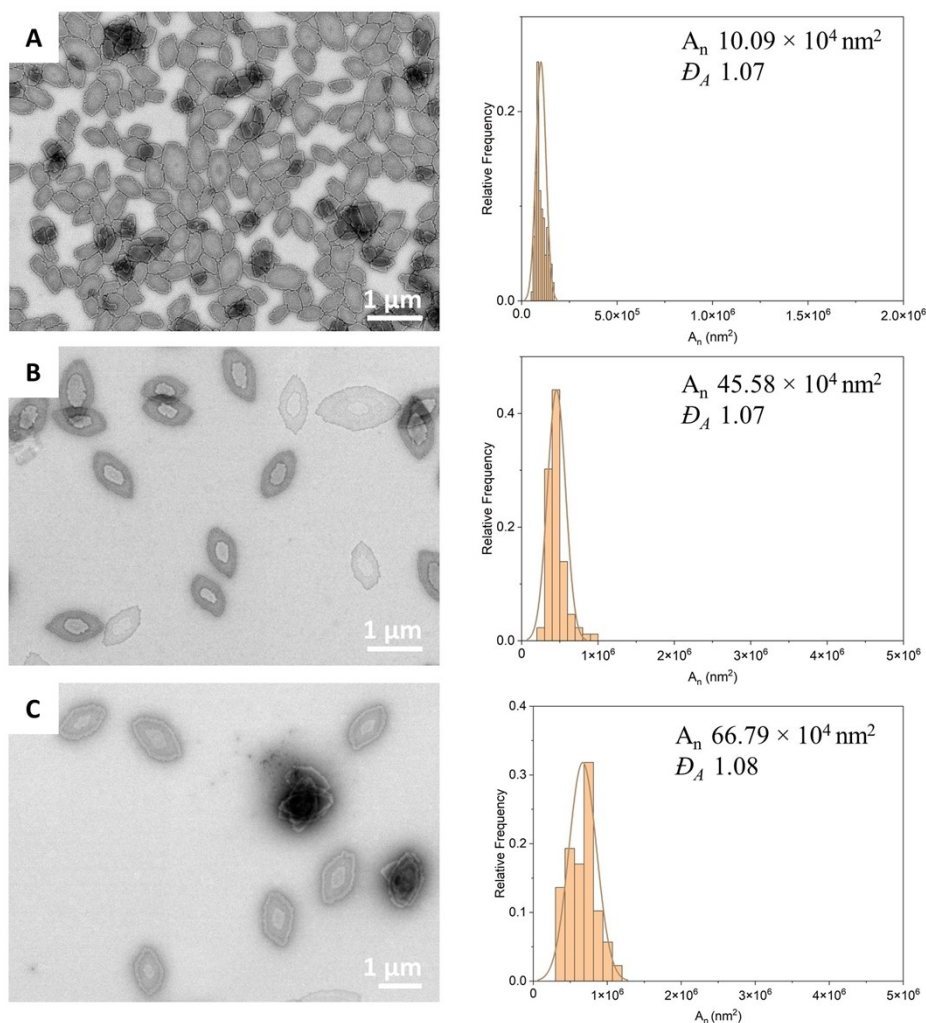

**Figure S30:** (A) TEM image of PDTC<sub>92</sub>-*b*-PEG<sub>132</sub> 2D platelets with an area of  $10.09 \times 10^4 \text{ nm}^2$  ( $D_A = 1.07$ ) in MeOH : THF = 95:5 and the contour area histogram for the corresponding platelets. (B) TEM image of PEG-*b*-P2VP block comicelles with an area of  $45.58 \times 10^4 \text{ nm}^2$  ( $D_A = 1.07$ ) in MeOH : THF = 95:5 prepared from preformed PDTC<sub>92</sub>-*b*-PEG<sub>132</sub> platelets ( $A_n = 10.09 \times 10^4 \text{ nm}^2$ ,  $D_A = 1.07$ ) and PDTC<sub>128</sub>-*b*-P2VP<sub>61</sub> unimer and the contour area histogram for the corresponding platelets. (C) TEM image of PEG-*b*-P2VP-*b*-PEG-Dy triblock comicelles with an area of  $66.79 \times 10^4 \text{ nm}^2$  ( $D_A = 1.08$ ) in MeOH : THF = 95:5 prepared from PEG-*b*-P2VP block comicelles and PDTC<sub>92</sub>-*b*-PEG<sub>132</sub>-Dy unimer and the contour area histogram for the corresponding platelets.

### Synthesis of PDTC<sub>92</sub>-*b*-PEG<sub>132</sub>-Dy (Dy = BODIPY)

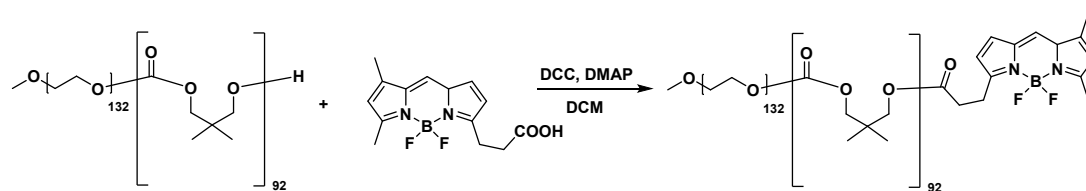

PDTC<sub>92</sub>-*b*-PEG<sub>132</sub> (60 mg, 1 equiv), BODIPY-FL carboxylic acid (2.1 mg, 2 equiv) and DMAP (0.04 mg, 0.1 equiv) were added to an oven-dried 10 mL vial equipped with a magnetic bar and dissolved in 3 mL of DCM. The reaction mixture was stirred for 20 min at 23 °C. Then, DCC (3.4 mg, 2.5 equiv) was added and the reaction mixture was stirred overnight at 23 °C. The reaction mixture was precipitated three times into ice-cold Et<sub>2</sub>O and collected by centrifugation. After drying in vacuo PDTC-*b*-PEG<sub>123</sub>-Dy was obtained as an orange solid (52 mg, 87%). UV-vis measurements were used to confirm the attachment of the BODIPY dye to the block copolymer.<sup>3</sup> The UV-vis spectrum of the dye-labeled block polymer showed strong absorbance at about 500 nm. In contrast, the starting materials PDTC<sub>92</sub>-*b*-PEG<sub>132</sub> did not show any obvious absorbance at a wavelength from 250 nm to 800 nm, indicating PDTC<sub>92</sub>-*b*-PEG<sub>132</sub> was labeled with the dye BODIPY successfully.

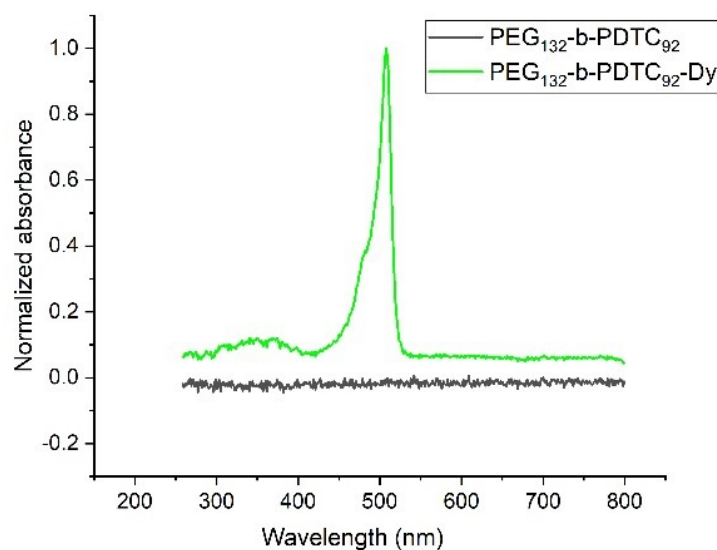

**Figure S31:** UV-vis spectrum of PDTC<sub>92</sub>-*b*-PEG<sub>132</sub>-Dy in CHCl<sub>3</sub> (green trace) and PDTC<sub>92</sub>-*b*-PEG<sub>132</sub> in CHCl<sub>3</sub> (black trace).

#### 4. Aqueous Stability and Biocompatibility Studies

To a 0.42 mL solution of PDTC<sub>92</sub>-*b*-PEG<sub>132</sub> seed micelles ( $A_n = 0.23 \times 10^4 \text{ nm}^2$ ,  $D_A = 1.35$ , 0.48 mg/mL, MeOH) was added 80  $\mu\text{L}$  of a 10 mg/mL THF solution of PDTC<sub>92</sub>-*b*-PEG<sub>132</sub> at 40 °C. The solution was manually shaken for  $\sim 10$  s and aged for 24 h at 23 °C. The resulting 2D platelets (0.5 mL, 2 mg/mL in MeOH:THF 10:1 v:v) were analyzed by TEM as shown in **Figure S32A**.

A nanoplatelet solution (0.5 mL, 2 mg/mL in MeOH: THF 10:1) was dialyzed against water for 72 h (molecular weight cut-off (MWCO) = 12,000-14,000 Da Spectra/Por). The water was replaced five times. The resulting platelets were analyzed by TEM as shown in **Figure S32B**. The micelles were stored at room temperature for 1 month and then analyzed by TEM as shown in **Figure S32C**.

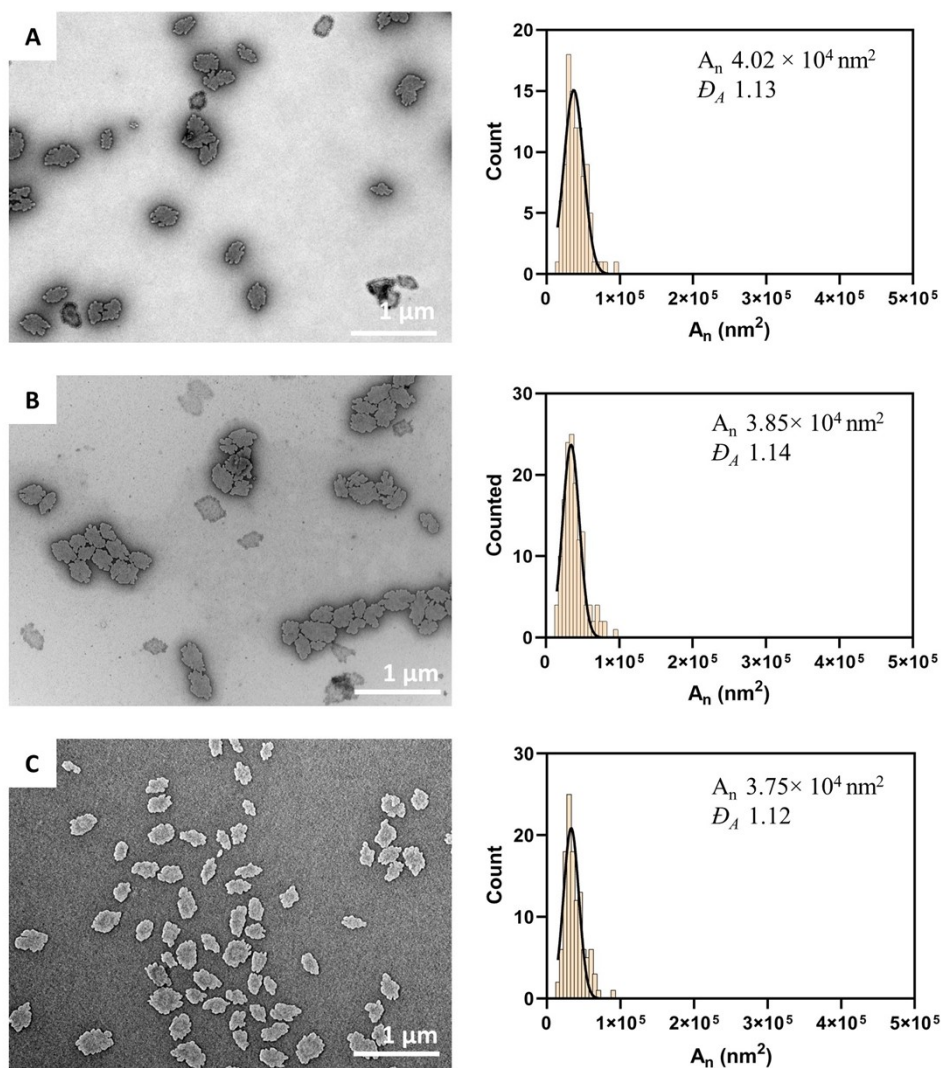

**Figure S32:** (A) TEM image of 2D platelets with an area of  $4.02 \times 10^4 \text{ nm}^2$  ( $D_A = 1.13$ ) at a concentration of 2 mg/ml in MeOH: THF = 95: 5 prepared by living CDSA from PDTC<sub>92</sub>-*b*-PEG<sub>132</sub> and the contour area histogram for the corresponding platelets. (B) TEM image of 2D platelets with an area of  $3.85 \times 10^4 \text{ nm}^2$  ( $D_A = 1.14$ ) after dialysis into water and the contour area histogram for the corresponding platelets. (C) TEM image of 2D platelets with an area of  $3.75 \times 10^4 \text{ nm}^2$  ( $D_A = 1.12$ ) in water stored for 1 month at 23 °C and the contour area histogram for the corresponding platelets.

## Culture Protocols

U-87 MG (Human glioblastoma cell line) was grown in Dulbecco's Minimal Essential Medium (DMEM) and WI-38 (Caucasian fibroblast-like fetal lung cells) was grown in Minimal Essential Medium (MEM). All growth media were supplemented with 10% fetal bovine serum (FBS). Confluent cultures (80% or less) were detached from the surface using trypsin (Tryp LE Express) and plated at  $1 \times 10^4$  cells/well ( $1 \times 10^5$  cells/mL) in 96-well plates. Cell culture media and additives were purchased from ThermoFisher Scientific.

## Cell Viability Assays

The biocompatibility of PDTC<sub>92</sub>-*b*-PEG<sub>132</sub> based 2D platelet micelles ( $A_n = 3.85 \times 10^4$  nm<sup>2</sup>,  $D_A = 1.14$ ) and 2,2-dimethylpropane-1,3-diol on U-87 MG and WI-38 was evaluated after 24 h of incubation and analyzed with the cell viability assay CellTiter-Glo 2.0 (Promega). CellTiter-Glo 2.0 determines the number of viable cells by quantifying ATP, which indicates the presence of metabolically active cells. The resulting luminescence signal is directly proportional to the number of viable cells. U-87 MG and WI-38 were incubated with 0 – 100 µg/mL of 2D platelet micelles ( $A_n = 3.85 \times 10^4$  nm<sup>2</sup>,  $D_A = 1.14$ ) and 0 - 250 µg/mL of 2,2-dimethylpropane-1,3-diol for 24 h. Polyethyleneimine (PEI) homopolymer (0.5 µM/mL) was used as a positive control. Each experiment was repeated in triplicate and each data point was repeated in triplicate. The cell viability assay was used according to the manufacturer protocol (Promega). For the addition of the assay, 50 µL of the growth media was removed from each well and 50 µL of CellTiter-Glo 2.0 was added (total volume 100 µL). After 30 min of incubation and stabilization of the luminescence signal, the luminescence was measured using a plate reader. The results were expressed as a percentage compared to the control cells without 2D platelet micelles or 2,2-dimethylpropane-1,3-diol present using GraphPad Prism 10 (**Table S2 and S3**).

**Table S3:** Cell viability of U-87 MG and WI-38 cells after the addition of 2D platelets (BCP = PDTC<sub>92</sub>-*b*-PEG<sub>132</sub>) at different concentrations ranging from 1-100 µg/mL. PEI was used as a positive control.

| 2D platelet micelles<br>(µg/ml) |                        | 100 | 75  | 50  | 25  | 10  | 5   | 2.5 | 1   | PEI<br>(1 µg/mL) |
|---------------------------------|------------------------|-----|-----|-----|-----|-----|-----|-----|-----|------------------|
| U-87<br>MG                      | Mean<br>(% of control) | 94  | 89  | 90  | 97  | 93  | 83  | 84  | 85  | 5                |
|                                 | σ<br>(% of control)    | 14  | 16  | 11  | 12  | 13  | 16  | 7   | 16  | 1                |
| WI-38                           | Mean<br>(% of control) | 106 | 116 | 108 | 107 | 100 | 105 | 103 | 103 | 10               |
|                                 | σ<br>(% of control)    | 13  | 19  | 19  | 15  | 13  | 20  | 19  | 21  | 3                |

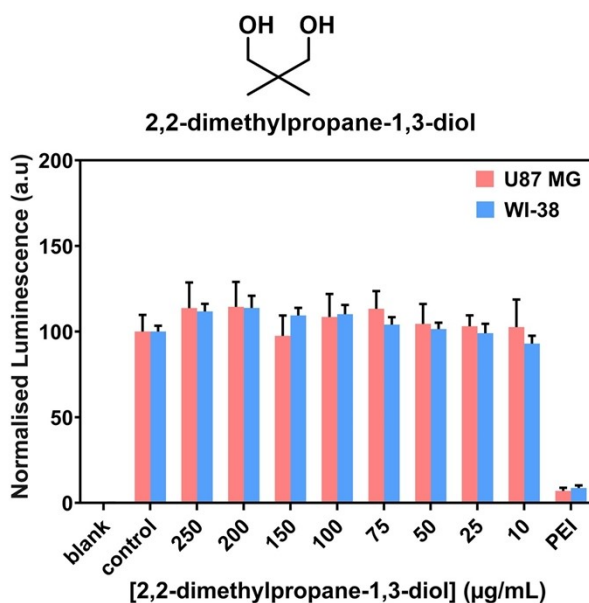

**Figure S33:** (A) Biocompatibility study of 2,2-dimethylpropane-1,3-diol towards U-87 MG and WI-38 after 24 h exposure with concentrations ranging from 10-250 µg/mL. PEI was used as a positive control (500 µg/mL). Cell viability was analyzed using CellTiter-Glo 2.0.



**Table S4:** Cell viability of WI-38 and U-87 MG cells after the addition of 2,2-dimethylpropane-1,3-diol at different concentrations ranging from 10-250  $\mu\text{L/mL}$ . PEI was used as a positive control.

| 2,2-dimethylpropane-1,3-diol<br>( $\mu\text{g/ml}$ ) |                            | 250 | 200 | 150 | 100 | 75   | 50  | 25  | 10  | PEI<br>(1 $\mu\text{g/mL}$ ) |
|------------------------------------------------------|----------------------------|-----|-----|-----|-----|------|-----|-----|-----|------------------------------|
| U-87<br>MG                                           | Mean<br>(% of control)     | 114 | 115 | 98  | 109 | 1113 | 104 | 103 | 103 | 7                            |
|                                                      | $\sigma$<br>(% of control) | 24  | 23  | 19  | 21  | 16   | 18  | 10  | 25  | 3                            |
| WI-38                                                | Mean<br>(% of control)     | 112 | 114 | 110 | 110 | 104  | 102 | 99  | 93  | 9                            |
|                                                      | $\sigma$<br>(% of control) | 6   | 10  | 6   | 8   | 6    | 5   | 8   | 6   | 2                            |

## 5. References

- (1) R. C. Pratt, B. G. G. Lohmeijer, D. A. Long, P. N. P. Lundberg, A. P. Dove, H. Li, C. G. Wade, R. M. Waymouth, and J. L. Hedrick, *Macromolecules*, 2006, **39**, 7863–7871.
- (2) Eisai R & D Management Co., Ltd. World Intellectual Property Organization, WO2007122686 A1, 2007.
- (3) R. Ridolfo, S. Tavakoli, V. Junnuthula, D. S. Williams, A. Urtti and J. C. M Van Hest, *Biomacromolecules*, 2021, **22**, 126–133.
